# Supplementary material for: CSQUiD: an index and non-probability framework for constrained skyline query processing over uncertain data
Source: PeerJ journal article supplement (doi:10.7717/peerj-cs.2225), 2024-09-16
Supplement: SQUiDExperimentalResults.zip [file SQUiDExperimentalResults.zip]

## Sheet: DS (pair-wise)
			Varying Data Set Size
					Pair-wise Comparison
	M = 12
	m = 6				PARAMETERS
	reinserrt = 3				TREES	records		M	m	Reinsert	fanout
	overlap = 0.2				Y	1m		12	6	3	5
	fanout = 5				Y	2m		12	6	3	5
	Epselon = 0.1				Y	4m		12	6	3	5
	Data distribution = 50%				Y	6m		12	6	3	5
	Dimension of synthetic data to be generated = 10				Y	8m		12	6	3	5
					Y	10m		12	6	3	5
			Correlated								Anti-correlated
		Number of Pair-wise comparison								Number of Pair-wise comparison
	Data set size (Million)	BBIS	SkyQUD	X(Mid)	SQUiD	Tree	SKYQUD	BBIS	Data set size (Million)	BBIS	SkyQUD	X(Mid)	SQUiD	SkyQUD	percentage
	1	41867325	100000000	14010576	14010643	Y	85.9894	66.5356	1	133338183438	200000000000	18458759706	1823973787	99.088	98.6321
	2	45292576	200000000	30452981	14010643	Y	92.9947	69.0664	2	396530442448	400000000000	55186034460	55204120758	86.199	86.0782
	4	112988986	400000000	60537793	60546162	N	84.8635	46.4141	4	1194505083617	1800000000000	162490356698	162533968082	90.9703	86.3932
	6	161492607	600000000	116334890	116348289	N	80.6086	27.9544	6	2178135775606	2800000000000	301570211399	301659169491	89.2265	86.1506
	8	210688651	800000000	155153237	155321374	N	80.5848	26.2792	8	2358135775606	4200000000000	458985686148	459094016466	89.0692	80.5315
	10	137640622	1000000000	183586902	183586902	N	81.6413	-33.3813	10	2571135775606	6000000000000	519094016466	519094016466	91.3484	79.8107
						total =	84.447	33.8114						90.9836	86.266
			Independent								Real
		Number of Pair-wise comparison								Number of Pair-wise comparison
	Data set size (Million)	BBIS	SkyQUD	X(Mid)	SQUiD	Tree	SkyQUD	BBIS	Data set size (Thousand)	BBIS	SkyQUD	X(Mid)	SQUiD	SkyQUD	BBIS
	1	11814058165	50000000000	1822367386	1823973787	Y	96.3521	84.561	2	1106648	10000	5660	5660	43.4	99.4885
	2	27984861083	65000000000	4464197055	4454588236	Y	93.1468	84.0821	4	4340387	15000	9927	9927	33.82	99.7713
	4	64908496567	100000000000	10211367393	10226908216	N	89.7731	84.2441	6	9440388	20000	18212	18212	8.94	99.8071
	6	106622030632	150000000000	17180104376	17192600759	N	88.5383	83.8752	8	16847761	24000	25746	22746	5.225	99.865
	8	176773532027	200000000000	24028829571	23912553576	N	88.0437	86.4728	10	26581222	29000	32267	27267	5.97586	99.8974
	10	202546152699	250000000000	32070399116	32070399116	N	87.1718	84.1664	12	37791661	33000	36140	30140	8.66667	99.9202
									14	51591703	35000	27799	27799	20.5743	99.9461
									16	63455784	40000	30373	30373	24.0675	99.9521
									18	74782837	50000	31369	31369	37.262	99.9581
									20	88220630	60000	7786	7786	87.0233	99.9912
							90.5043	84.5669
														27.4955	99.8597
					SkyQUD	73.3576
					BBIS	76.126

## Sheet: DS (CPU-time)
			Varying Data Set Size
					CPU Processing Time
	M = 12
	m = 6					PARAMETERS
	reinserrt = 3					TREES	records	M	m	Reinsert	Fanout
	overlap = 0.2					Y	1m	12	6	3	5
	fanout = 5					Y	2m	12	6	3	5
	Epselon = 0.1					Y	4m	12	6	3	5
	Data distribution = 50%					Y	6m	12	6	3	5
	Dimension of synthetic data to be generated = 10					Y	8m	12	6	3	5
						Y	10m	12	6	3	5
			Correlated										Anti-correlated
		CPU processing Time										CPU processing Time
	Data set size (Million)	BBIS	SkyQUD	X(Mid)	SQUiD	bbis	skyQuD				Data set size (Million)	BBIS	SkyQUD	X(Mid)	SQUiD	bbis	skyqud
	1	254	99	99	67	73.622	32.3232				1	39975	20000	7172	852	97.8687	95.74
	2	673	110	139	110	83.6553	0				2	120595	30000	22857	24412	79.757	18.6267
	4	2887	230	301	230	92.0333	0				4	375528	80000	70043	75347	79.9357	5.81625
	6	7027	280	380	248	96.4708	11.4286				6	664154	160000	137463	144287	78.2751	9.82062
	8	12970	450	450	302	97.6715	32.8889				8	784154	180000	216624	153420	80.435	14.7667
	10	20718	780	780	642	96.9012	17.6923				10	834415	220000		175420	78.9769	20.2636
						90.059	15.7222
																82.5414	27.5056
			Independent										Real
		CPU processing Time										CPU processing Time
	Data set size (Million)	BBIS	SkyQUD	X(Mid)	SQUiD						Data set size (Thousand)	BBIS	SkyQUD	X(Mid)	SQUiD
	1	4050	1000	706	706	82.5679	29.4				2	13	13	13	18	-38.4615	-38.4615
	2	11492	2100	1969	1969	82.8663	6.2381				4	24	24	13	20	16.6667	16.6667
	4	25259	5200	4682	4682	81.464	9.96154				6	50	26	15	19	62	26.9231
	6	44012	8200	7990	7990	81.8459	2.56098				8	45	30	13	17	62.2222	43.3333
	8	73810	13204	13204	8900	87.942	32.5962				10	50	35	17	15	70	57.1429
	10	136804	16164	16164	10000	92.6903	38.1341				12	26	22	22	19	26.9231	13.6364
											14	26	26	14	22	15.3846	15.3846
											16	38	30	36	19	50	36.6667
											18	33	38	41	20	39.3939	47.3684
											20	37	47	17	17	54.0541	63.8298
						84.8961	19.8152
																59.6972	47.0817
						BBIS	27.5312
						SkyQUD	79.2984

## Sheet: DD (pair-wise)
			Varying Data Distribution
					Pair-wise Comparison
	Epselon = 0.1
	Data set size = 1,000,000
	Dimension of synthetic data to be generated = 10
	M = 12
	m = 6
	reinsert = 3
	fanout = 5
			Correlated							Anti-correlated
		Number of Pair-wise comparison							Number of Pair-wise comparison
	Data Distribution (%)	BBIS	SkyQUD	X(Mid)	SQUiD	BBIS	SKyQUD	Data Distribution (%)	BBIS	SkyQUD	X(Mid)	SQUiD	BBIS	SkyDUQ
	10	69738471	20000000	11711282	11714561	83.2022	41.4272	10	126386138706	135000000000	17869069445	17869861677	85.8609	86.7631
	20	23389099	20000000	11613895	11615342	50.3387	41.9233	20	126528956111	138000000000	17979365357	17982994307	85.7874	86.9688
	30	55208746	20000000	11653096	11623954	78.9454	41.8802	30	129801481958	140000000000	17979365357	18287786540	85.911	86.9373
	40	26210516	20000000	13943601	13944969	46.7963	30.2752	40	133921926065	150000000000	17949075735	17954316137	86.5934	88.0305
	50	28531217	20000000	11626902	11591312	59.3732	42.0434	50	130496855291	155000000000	18105075333	18108760011	86.1232	88.3169
	60	91826250	20000000	12574829	11591312	87.3769	42.0434	60	134378198141	160000000000	18354809201	18360787549	86.3365	88.5245
	70	62962930	20000000	12863728	12860543	79.5744	35.6973	70	130799292309	170000000000	18486247911	18490675251	85.8633	89.1231
	80	20651551	20000000	11503437	11502794	44.3006	42.486	80	134194780044	175000000000	18589448361	18589779198	86.1472	89.3773
	90	9817903	20000000	9844168	9844168	-0.267521	50.7792	90	135475079246	180000000000	18983339793	18983250262	85.9876	89.4537
						58.8489	40.9506						86.0678	88.1661
			Independent							Real
		Number of Pair-wise comparison							Number of Pair-wise comparison
	Data Distribution (%)	BBIS	SkyQUD	X(Mid)	SQUiD			Data Distribution (%)	BBIS	SkyQUD	X(Mid)	SQUiD
	10	13536164305	18000000000	2043051158	2043155013	84.906	88.6491	10	88220630	20000	31507	31507	99.9643	-57.535
	20	13007188271	19000000000	1900942296	1901370214	85.3822	89.9928	20	88220630	40000	31507	31507	99.9643	21.2325
	30	13202859624	19000000000	1904826975	1902550377	85.5899	89.9866	30	88220630	40000	31507	31507	99.9643	21.2325
	40	11696246790	19000000000	1781708534	1782044212	84.764	90.6208	40	88220630	20000	31507	31507	99.9643	-57.535
	50	12937624659	19000000000	1903989988	1903249586	85.289	89.9829	50	88220630	10000	31507	31507	99.9643	-215.07
	60	14475760185	19000000000	1876038415	1876257068	87.0386	90.125	60	88220630	11500	31507	31507	99.9643	-173.974
	70	13036483071	19000000000	1781279634	1782039005	86.3304	90.6208	70	88220630	10000	31507	31507	99.9643	-215.07
	80	12913576790	19000000000	1990742545	1990742545	84.5841	89.5224	80	88220630	10000	31507	31507	99.9643	-215.07
	90	14015273869	18000000000	1912949697	1913476004	86.3472	89.3696	90	88220630	10000	31507	31507	99.9643	-215.07
						85.5813	89.8744						99.9643	-122.984
				BBIIS	82.6156
				SkyQUD	24.0017

## Sheet: DD (CPU-time)
			Varying Data Distribution
					CPU Processing Time
	Epselon = 0.1
	Data set size = 1,000,000
	Dimension of synthetic data to be generated = 10
	M = 12
	m = 6
	reinsert = 3
	fanout = 5
			Correlated								Anti-correlated
		CPU processing Time				BBIS	SKYQUD			CPU processing Time
	Data Distribution (%)	BBIS	SkyQUD	X(Mid)	SQUiD				Data Distribution (%)	BBIS	SkyQUD	X(Mid)	SQUiD	BBIS	SKYQUD
	10	160	102	39	73	54.375	28.4314		10	36919	7200	6891	7455	79.8071	-3.54167
	20	154	123	46	80	48.0519	34.9593		20	36922	7200	6941	7361	80.0634	-2.23611
	30	161	135	35	72	55.2795	46.6667		30	37876	7200	6886	7469	80.2804	-3.73611
	40	179	155	38	74	58.6592	52.2581		40	40456	7000	6822	7326	81.8914	-4.65714
	50	172	147	40	67	61.0465	54.4218		50	39292	7500	7117	7388	81.1972	1.49333
	60	162	115	40	67	58.642	41.7391		60	38923	7700	7047	7560	80.577	1.81818
	70	160	136	40	71	55.625	47.7941		70	39805	8000	57083	8197	79.4071	-2.4625
	80	150	125	37	70	53.3333	44		80	38836	8500	7113	7721	80.119	9.16471
	90	146	127	35	61	58.2192	51.9685		90	38473	9300	7191	7866	79.5545	15.4194
						55.9146	44.6932							80.3219	1.25134
			Independent								Real
		CPU processing Time								CPU processing Time
	Data Distribution (%)	BBIS	SkyQUD	X(Mid)	SQUiD				Data Distribution (%)	BBIS	SkyQUD	X(Mid)	SQUiD
	10	4528	1400	778	921	79.6599	34.2143		10	45	38	18	33	26.6667	13.1579
	20	4314	1500	727	867	79.9026	42.2		20	47	42	18	35	25.5319	16.6667
	30	4479	1600	727	926	79.3257	42.125		30	50	35	17	32	36	8.57143
	40	3914	1650	669	823	78.9729	50.1212		40	45	35	17	32	28.8889	8.57143
	50	4428	1700	740	900	79.6748	47.0588		50	43	40	14	36	16.2791	10
	60	4806	1750	720	854	82.2305	51.2		60	47	38	15	32	31.9149	15.7895
	70	4405	1800	723	801	81.8161	55.5		70	43	37	12	33	23.2558	10.8108
	80	4262	1900	795	895	79.0005	52.8947		80	46	40	11	34	26.087	15
	90	4576	1800	727	876	80.8566	51.3333		90	54	43	13	35	35.1852	18.6047
						80.16	47.4053							27.7566	13.0192
					BBIS	61.0383
					SkyQUD	26.5922

## Sheet: DM (pair-wise)
			Varying Dimension
	synthetic data set				Pair-wise Comparison
	Epselon = 0.1
	Data set size = 1,000,000
	Dimension of synthetic data to be generated = 10
			Correlated										Anti-correlated
		Number of Pair-wise comparison				Dimension	M	m	Reinsert	fanout		Number of Pair-wise comparison				BBIS		SkyQUD
	Dimension	BBIS	SkyQUD	X(Mid)	SQUiD						Dimension	BBIS	SkyQUD	X(Mid)	SQUiD	C	A	C	A
	3	1078428	1000000000	2154509	978428	3	30	15	9	13	3	30732743	10000000000	9271524	9478257	9.27276	69.1591	99.9022	99.9052
	6	2842115	2000000000	4663218	2464648	6	20	10	6	9	6	4096209150	20000000000	924504178	924963900	13.2812	77.419	99.8768	95.3752
	10	36569348	3000000000	12724958	12681153	10	12	6	3	5	10	127224010659	180000000000	18395782714	18399164891	65.323	85.538	99.5773	89.7782
	15	151082232	5000000000	55882975	55853826	15	8	4	2	3	15	363764740123	460000000000	39725553469	39727730735	63.0308	89.0787	98.8829	91.3635
	20	1433170614	35000000000	241966223	241900789	20	6	3	1	2	20	463280790494	500000000000	42465971270	42467288959	83.1213	90.8334	99.3089	91.5065
																46.8058	82.4056	99.5096	93.5857
			Independent										Real
		Number of Pair-wise comparison				Dimension	M	m	Reinsert	fanout		Number of Pair-wise comparison				I	R	I	R
	Dimension	BBIS	SkyQUD	X(Mid)	SQUiD						Dimension	BBIS	SkyQUD	X(Mid)	SQUiD
	3	3296183	10000000000	2544791	3206666	6	20	10	6	13	6	19086214	40000	3616	3616	2.71578	99.9811	99.9679	90.96
	6	138011381	10000000000	58099594	54631286	10	12	6	3	5	10	36807508	50000	3716	3716	60.4154	99.9899	99.4537	92.568
	10	11968260092	20000000000	1892664054	1892952498	15	8	4	2	3	15	37239588	60000	4352	4352	84.1836	99.9883	90.5352	92.7467
	15	194638491127	200000000000	19828341172	19828814034	17	7	3	1	2	17	88220630	70000	4352	4352	89.8125	99.9951	90.0856	93.7829
	20	436337803627	440000000000	38946216752	38945333528											91.0745		91.1488
																65.6403	99.9886	94.2382	92.5144
														SkyQUD	94.962
														BBIS	73.7101

## Sheet: DM (CPU-time)
			Varying Dimension
					CPU procesing Time
	Epselon = 0.1
	Data set size = 1,000,000
	Dimension of synthetic data to be generated = 10
			Correlated										Anti-correlated
		CPU processing Time										CPU processing Time				C		A
	Dimension	BBIS	SkyQUD	X(Mid)	SQUiD	Dimension	M	m	Reinsert	fanout	Dimension	BBIS	SkyQUD	X(Mid)	SQUiD	BBIS	skyQUD	BBIS	skyQUD
	3	263	100	17	54						3	142	1000	46	84	79.4677	46	40.8451	91.6
	6	170	100	36	60	3	30	15	9	13	6	1363	1000	364	463	64.7059	40	66.0308	53.7
	10	186	150	53	90	6	20	10	6	9	10	36681	8000	7225	7586	51.6129	40	79.319	5.175
	15	278	200	81	119	10	12	6	3	5	15	133565	20000	16261	16656	57.1942	40.5	87.5297	16.72
	20	869	1600	151	228	15	8	4	2	3	20	205800	22000	18357	18248	73.7629	85.75	91.1331	17.0545
						20	6	3	1	2
																65.3487	50.45	72.9715	36.8499
			Independent										Real
		CPU processing Time										CPU processing Time
	Dimension	BBIS	SkyQUD	X(Mid)	SQUiD	dimension	M	m	Reinsert	fanout	Dimension	BBIS	SkyQUD	X(Mid)	SQUiD	I		R
	3	211	1000	23	85						6	21	19	15	17	59.7156	91.5	19.0476	10.5263
	6	241	1000	60	194	6	20	10	6	13	10	30	28	25	17	19.5021	80.6	43.3333	39.2857
	10	4039	2000	748	906	10	12	6	3	5	15	43	38	29	27	77.5687	54.7	37.2093	28.9474
	15	72271	8000	8464	8000	15	8	4	2	3	17	53	30	24	38	88.9306	0	28.3019	-26.6667
	20	200418	20000	16634	17058	17	7	3	1	2						91.4888	14.71
																67.4412	48.302	31.973	13.0232
															BBIS	59.4336
															SkyQUD	37.1563

## Sheet: Epselon (CPU-time)
			Constrained skyline Query
	size of constrained query = % of the volume of the data set
	constrained query will be uniformly generated
	skyline result for constrained query = the average of 50 uniformly generated query
			Correlated
		CPU processing Time
	parameter	Values
	Data type	synthetic	Real
	No of records	100000	21961
	Data Distribution	50
	Number of Dimension	3	17
	Selectivity ratio	.1, 8, 16, 32, 64, 98, 98.5, 99, 99.5

## Sheet: CQ(CPU time)
			Anti-Correlated							Correlated
		CPU Processing Time							CPU Processing Time
	% of constrained Query	CIS	SkyQUD-LA	CSQUiD				% of constrained Query	CIS	SkyQUD-LA	CSQUiD
	0.1	22	21	20	9.09091	4.7619		0.1	18	22	18	0	18.1818
	8	25	23	22	12	4.34783		8	24	22	22	8.33333	0
	16	23	22	22	4.34783	0		16	24	23	19	20.8333	17.3913
	32	25	23	19	24	17.3913		32	30	25	17	43.3333	32
	64	24	22	17	29.1667	22.7273		64	34	28	18	47.0588	35.7143
	98	21	20	17	19.0476	15		98	19	17	15	21.0526	11.7647
	98.5	29	25	22	24.1379	12		98.5	25	23	20	20	13.0435
	99	24	22	21	12.5	4.54545		99	22	21	21	4.54545	0
	99.5	30	25	18	40	28		99.5	28	23	19	32.1429	17.3913
												21.9222	16.1652
					19.3657	12.086
			Independent							Real
		CPU Processing Time							CPU Processing Time
	% of constrained Query	CIS	SkyQUD-LA	CSQUiD				% of constrained Query	CIS	SkyQUD-LA	ASQUiD
	0.1	18	15	13	27.7778	13.3333		0.1	8	4	4	50	0
	8	30	17	18	40	-5.88235		8	10	8	6	40	25
	16	26	20	16	38.4615	20		16	12	12	10	16.6667	16.6667
	32	25	22	14	44	36.3636		32	13	14	10	23.0769	28.5714
	64	28	24	17	39.2857	29.1667		64	17	18	11	35.2941	38.8889
	98	37	28	16	56.7568	42.8571		98	20	20	13	35	35
	98.5	27	25	21	22.2222	16		98.5	17	18	13	23.5294	27.7778
	99	25	22	15	40	31.8182		99	14	15	11	21.4286	26.6667
	99.5	24	20	18	25	10		99.5	18	17	13	27.7778	23.5294
					37.056	21.5174						30.3082	24.6779
					27.163		18.6116

## Sheet: CQ(Pairwise)
			Anti-Correlated							Correlated
		Number of Pair-wise comparison							Number of Pair-wise comparison
	% of constrained Query	CIS	SkyQUD-LA	ASQUiD				% of constrained Query	CIS	SkyQUD-LA	ASQUiD
	0.1	2921		1531	47.5864		12.1795	0.1	624		548
	8	219929		148542	32.4591		9.8782	8	30623		27598
	16	222295		188483	15.2104		5.16285	16	21093		20004
	32	247838		225294	9.09626		-0.162467	32	30160		30209
	64	240074		170850	28.8344		9.8507	64	36637		33028
	98	213262		170646	19.9829		1.57301	98	25429		25029
	98.5	343068		108420	68.3969		0.45003	98.5	23554		23448
	99	354139		204828	42.1617		9.26547	99	27446		24903
	99.5	258256		135038	47.7116		4.40779	99.5	27769		26545
					34.6044		5.84501
			Independent							Real
		Number of Pair-wise comparison							Number of Pair-wise comparison
	% of constrained Query	CIS	SkyQUD-LA	ASQUiD				% of constrained Query	CIS	SkyQUD-LA	ASQUiD
	0.1	2025		493	75.6543		0	0.1	0		0
	8	46134		25914	43.8288		100	8	44		0
	16	63361		36549	42.3163		99.6169	16	261		1
	32	54502		23334	57.1869		99.7588	32	2073		5
	64	51308		25791	49.733		99.8214	64	10636		19
	98	68545		31424	54.1557		99.7635	98	21560		51
	98.5	37182		28722	22.7529		99.8375	98.5	21534		35
	99	55715		28503	48.8414		99.577	99	8984		38
	99.5	51067		35877	29.7452		99.7687	99.5	13837		32
					47.135		88.6826
					44.0668

## Sheet: Mv(Pairwise)
			Anti-Correlated									Correlated
		Number of Pair-wise comparison									Number of Pair-wise comparison
	% of constrained Query	CIS	CSQUiD	ASQUiD						% of constrained Query	CIS	CSQUiD	ASQUiD
	0.1	30.15	20	6	80.0995	70		70	87.5	0.1	24	10	3
	8	1245	834	604	51.4859	27.5779		38.7127	73.572	8	2486	1072	657
	16	4523	2438	1350	70.1526	44.6267		47.6464	77.821	16	2056	871	456
	32	48672	14781	4335	91.0934	70.6718		70.4601	89.253	32	11231	4086	1207
	64	112671	57136	7369	93.4597	87.1027		78.7879	91.2447	64	23106	9537	2023
	98	190234	73362	10975	94.2308	85.0399		76.5925	89.3482	98	30117	13705	3208
	98.5	194223	86322	11511	94.0733	86.665		75.0901	88.8275	98.5	34012	15255	3800
	99	204215	109104	11705	94.2683	89.2717		76.2422	88.5673	99	35005	16845	4002
	99.5	214295	1113937	11903	94.4455	98.9314		79.6041	90.3893	99.5	42671	20107	4101
					84.8121	73.3208		68.1262	86.2803
			Independent									Real
		Number of Pair-wise comparison									Number of Pair-wise comparison
	% of constrained Query	CIS	CSQUiD	ASQUiD						% of constrained Query	CIS	CSQUiD	ASQUiD
	0.1	22	10	4	81.8182	60				0.1
	8	2896	445	280	90.3315	37.0787				8
	16	8563	3640	1800	78.9793	50.5495				16
	32	13567	5801	2200	83.7842	62.0755				32
	64	30112	12752	2609	91.3357	79.5405				64
	98	32789	17542	5433	83.4304	69.0286				98
	98.5	34123	19667	6322	81.4729	67.8548				98.5
	99	30127	22740	6432	78.6504	71.715				99
	99.5	33952	23330	8093	76.1634	65.3108				99.5
					82.8851	62.5726

[truncated: 1 more sheets: Mv(CPU time)]
