# Supplementary figures and images for: CSQUiD: an index and non-probability framework for constrained skyline query processing over uncertain data
Source: PeerJ journal article supplement (doi:10.7717/peerj-cs.2225), 2024-09-16

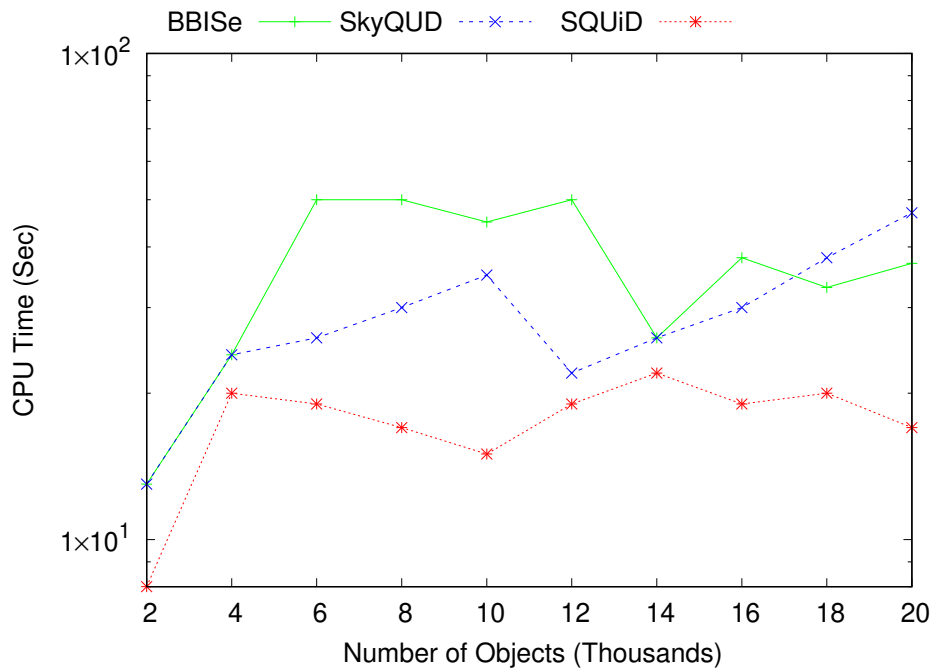

Supplement: SQUiDExperimentalResults.zip [file SQUiDExperimentalResults.zip]

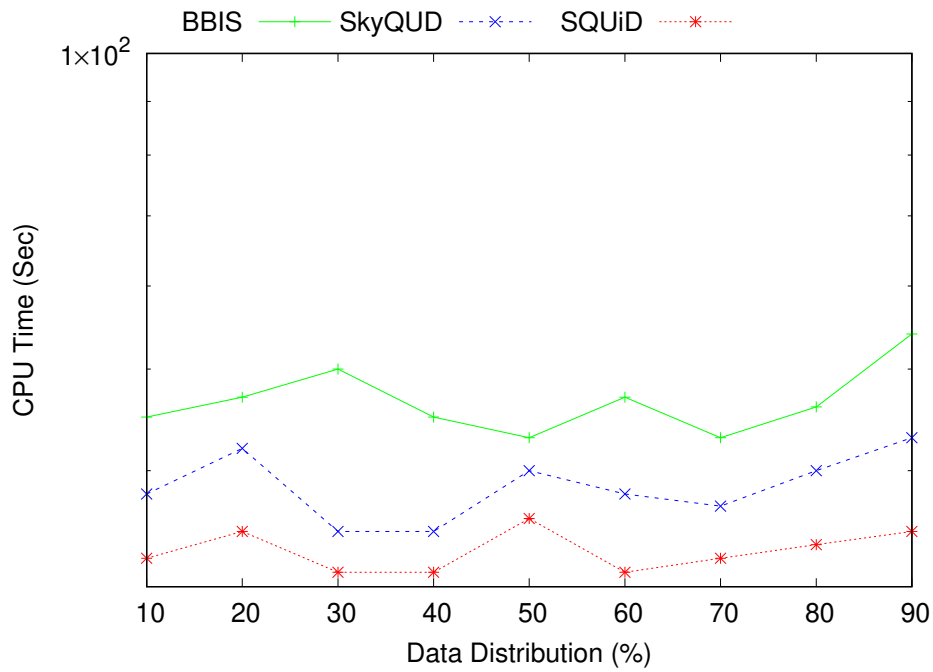

Supplement: SQUiDExperimentalResults.zip [file SQUiDExperimentalResults.zip]

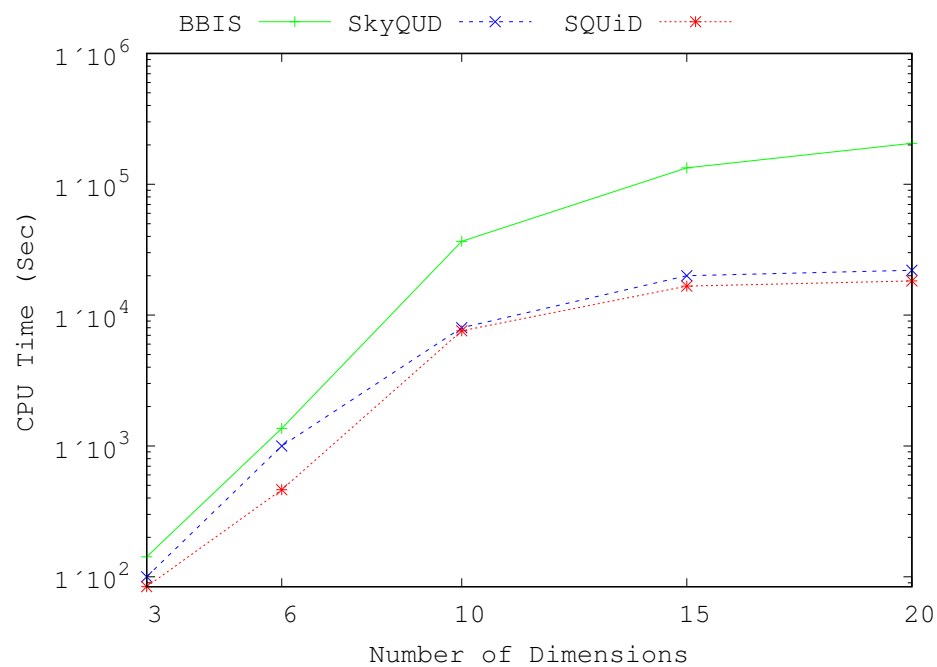

Supplement: SQUiDExperimentalResults.zip [file SQUiDExperimentalResults.zip]

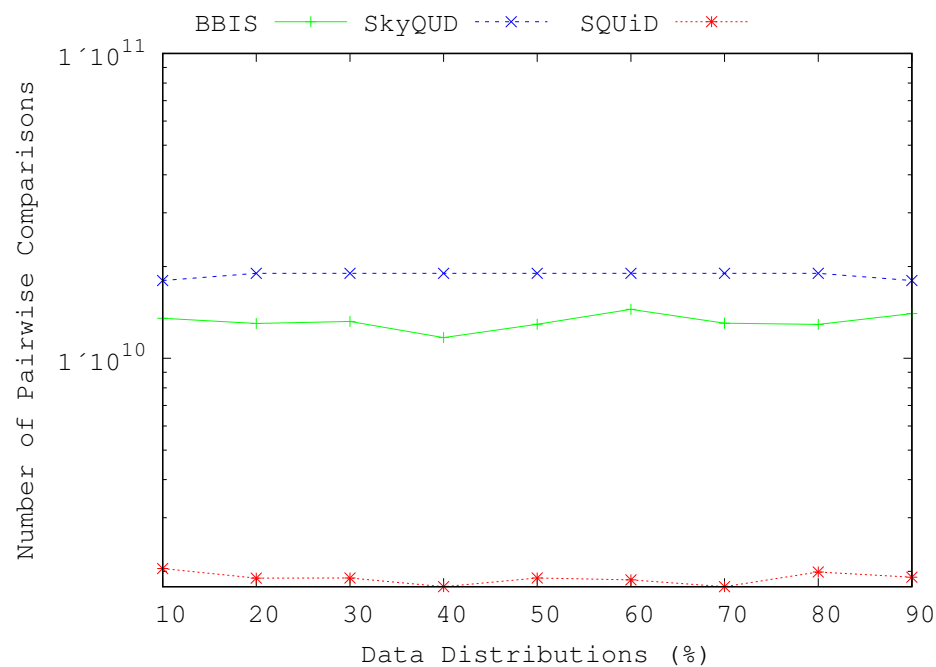

Supplement: SQUiDExperimentalResults.zip [file SQUiDExperimentalResults.zip]

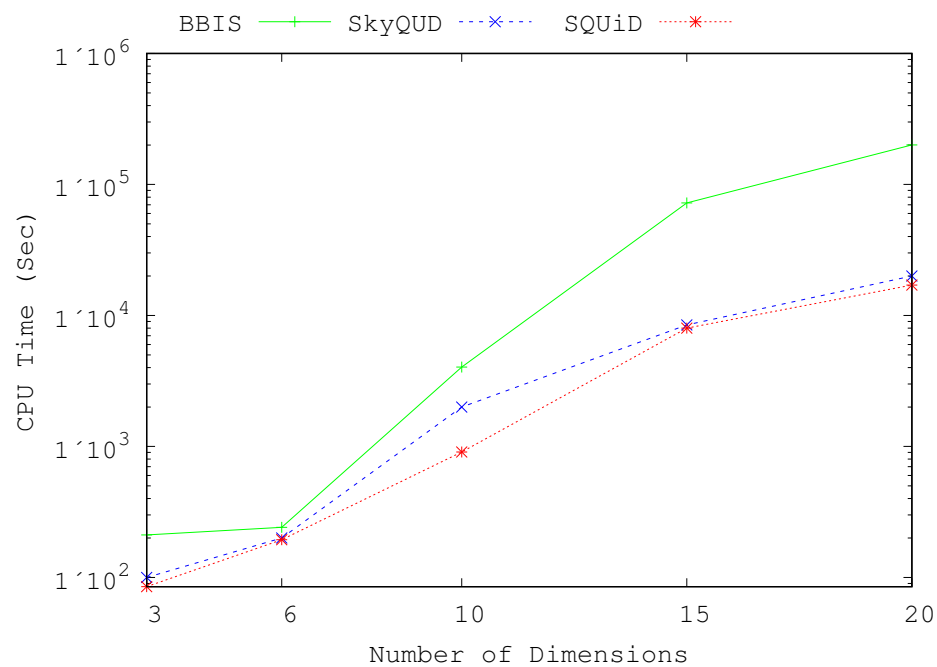

Supplement: SQUiDExperimentalResults.zip [file SQUiDExperimentalResults.zip]

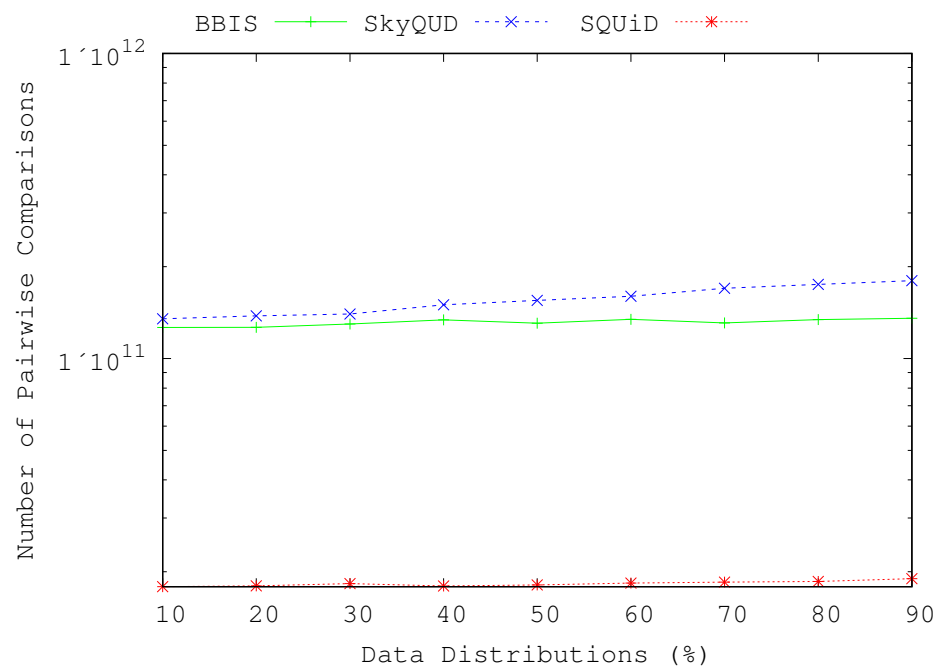

Supplement: SQUiDExperimentalResults.zip [file SQUiDExperimentalResults.zip]

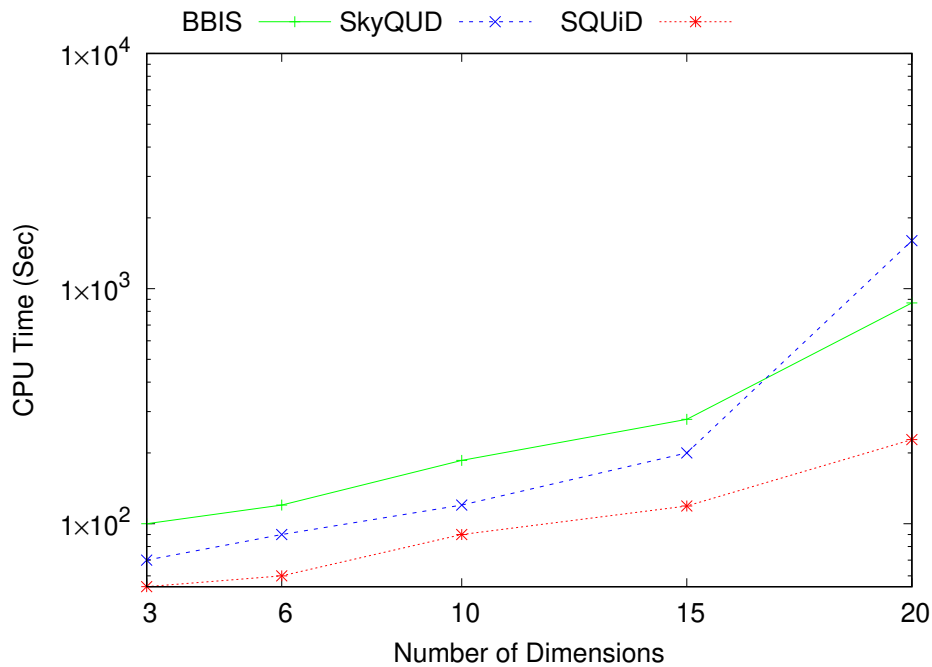

Supplement: SQUiDExperimentalResults.zip [file SQUiDExperimentalResults.zip]

Number of Pairwise Comparisons

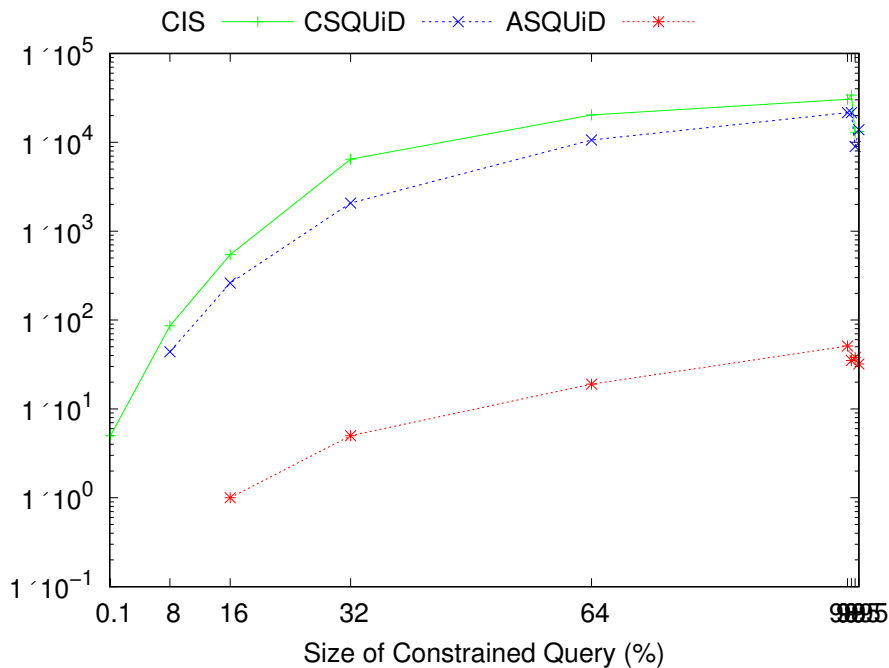

Supplement: SQUiDExperimentalResults.zip [file SQUiDExperimentalResults.zip]

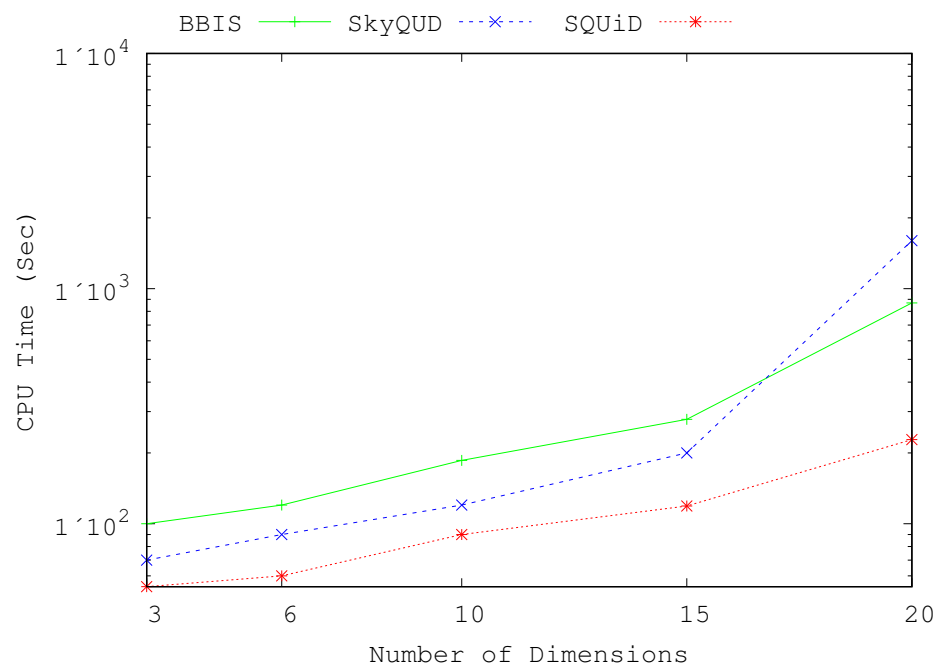

Supplement: SQUiDExperimentalResults.zip [file SQUiDExperimentalResults.zip]

Number of Pairwise Comparisons

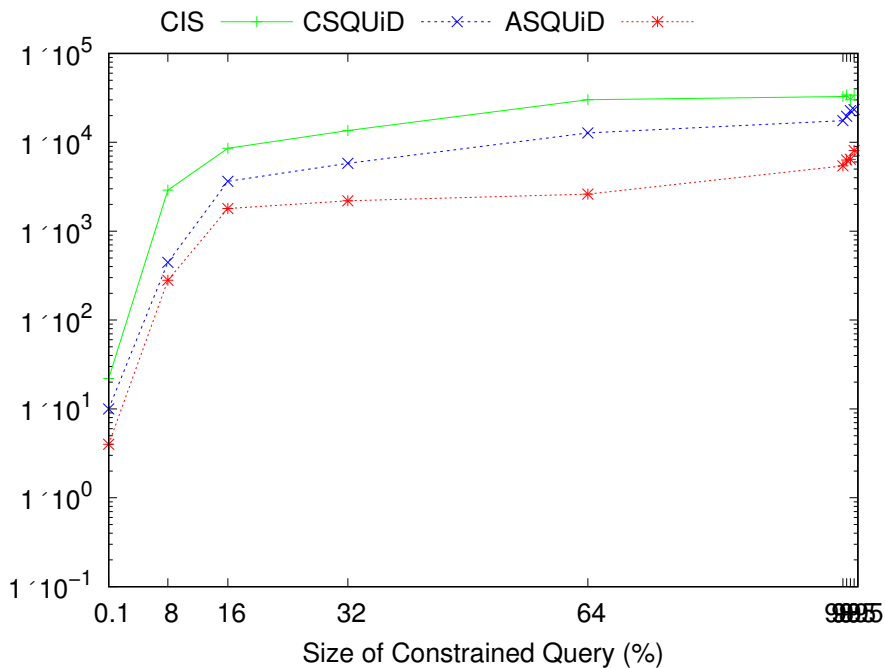

Supplement: SQUiDExperimentalResults.zip [file SQUiDExperimentalResults.zip]

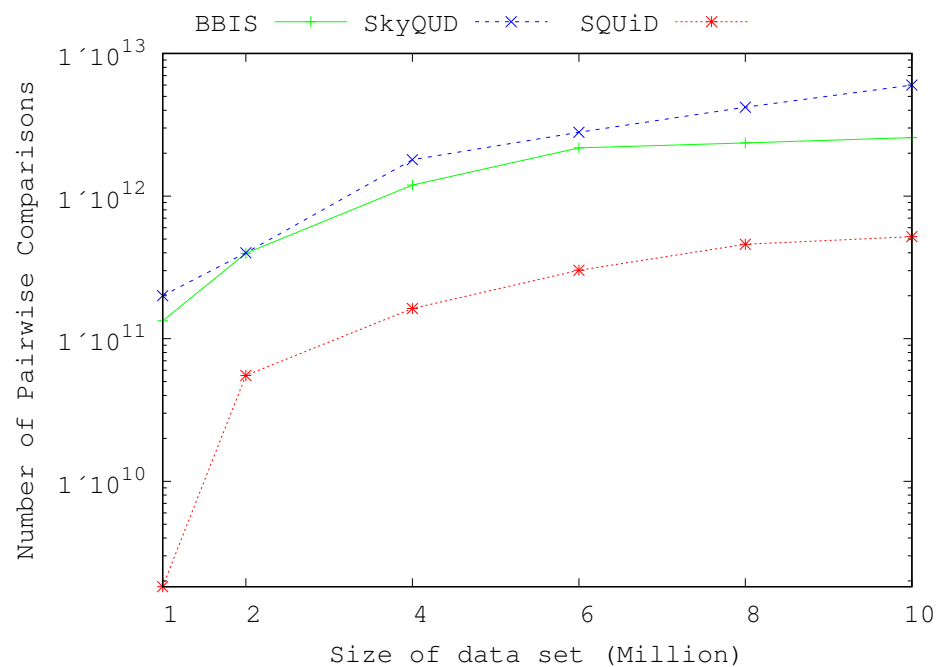

Supplement: SQUiDExperimentalResults.zip [file SQUiDExperimentalResults.zip]

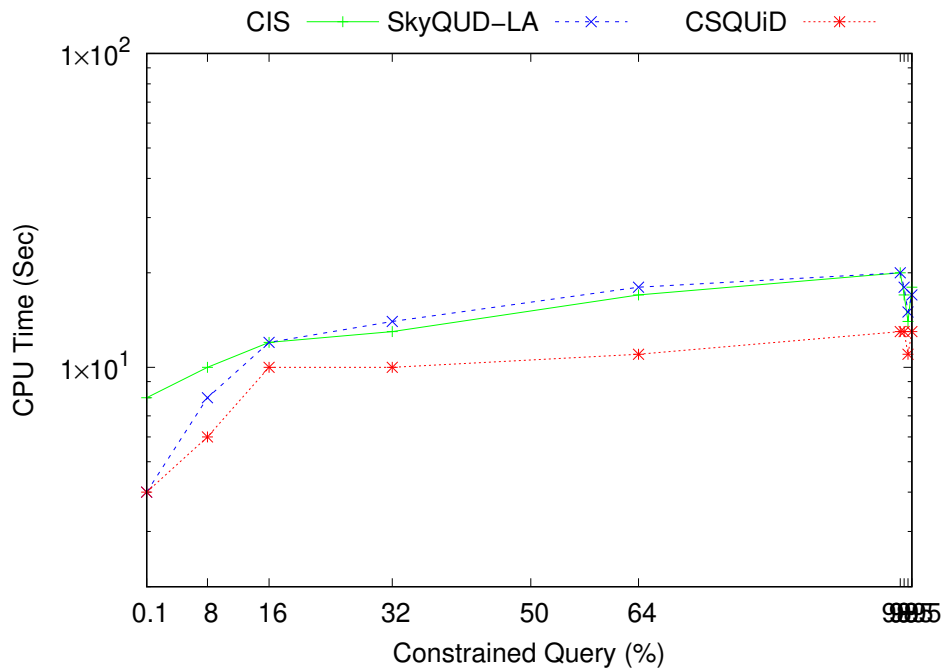

Supplement: SQUiDExperimentalResults.zip [file SQUiDExperimentalResults.zip]

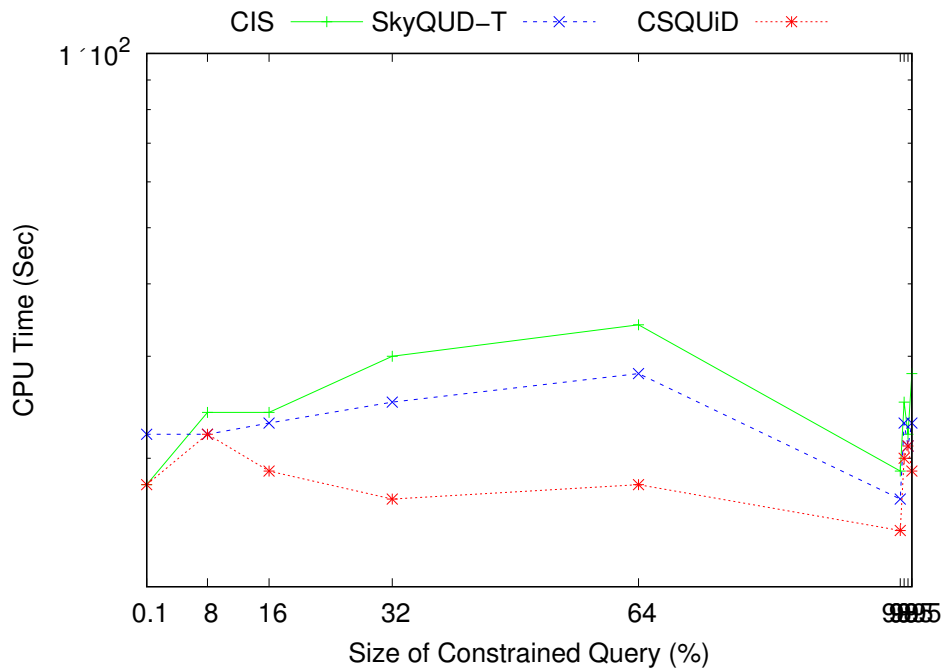

Supplement: SQUiDExperimentalResults.zip [file SQUiDExperimentalResults.zip]

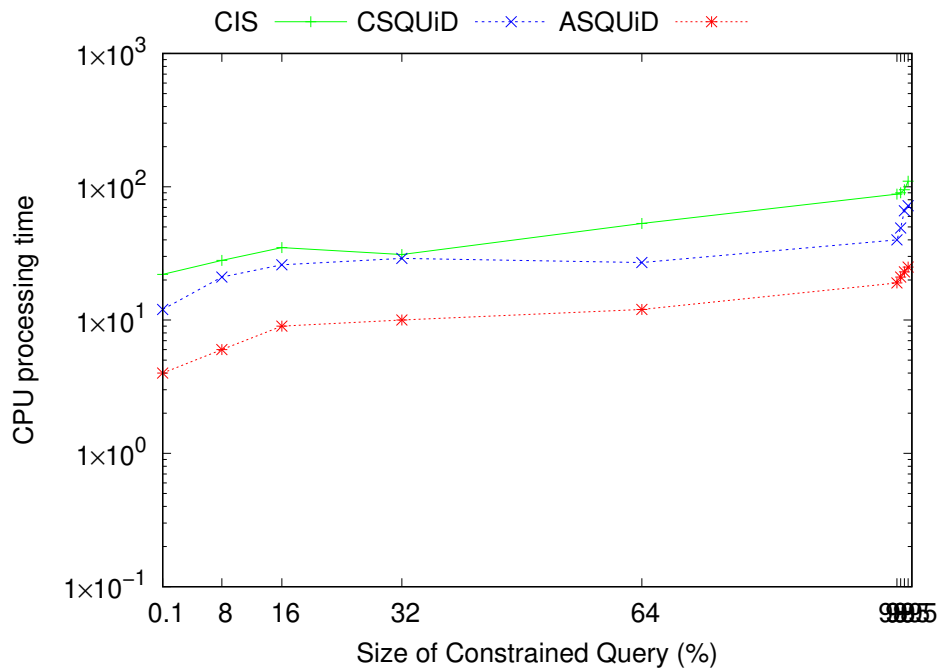

Supplement: SQUiDExperimentalResults.zip [file SQUiDExperimentalResults.zip]

Number of Pairwise Comparisons

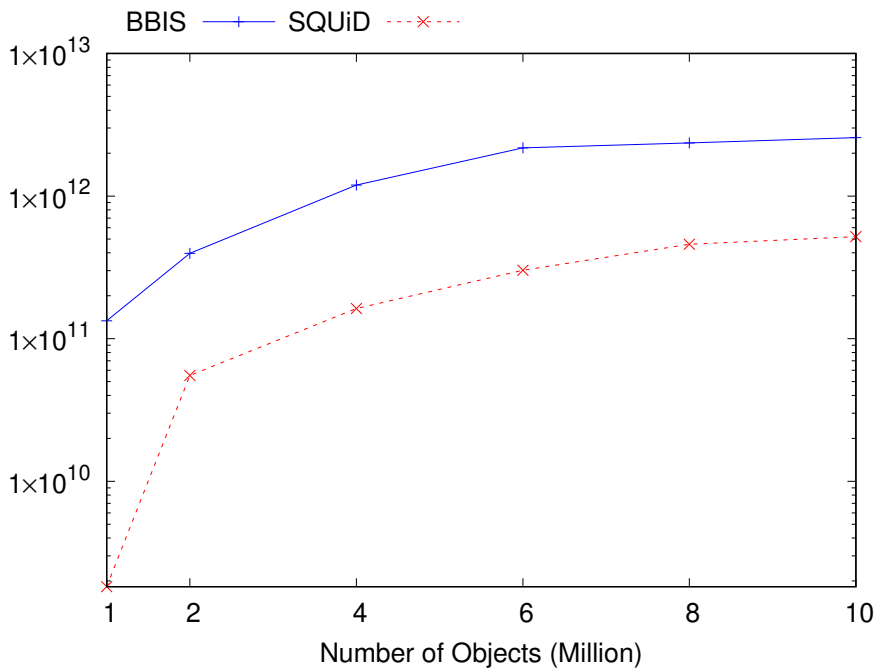

Supplement: SQUiDExperimentalResults.zip [file SQUiDExperimentalResults.zip]

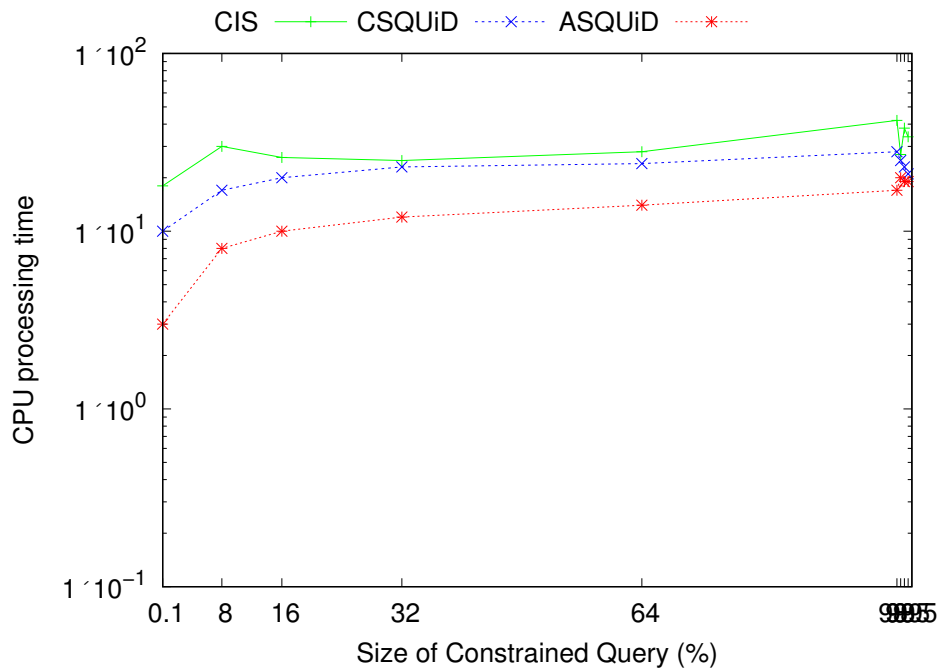

Supplement: SQUiDExperimentalResults.zip [file SQUiDExperimentalResults.zip]

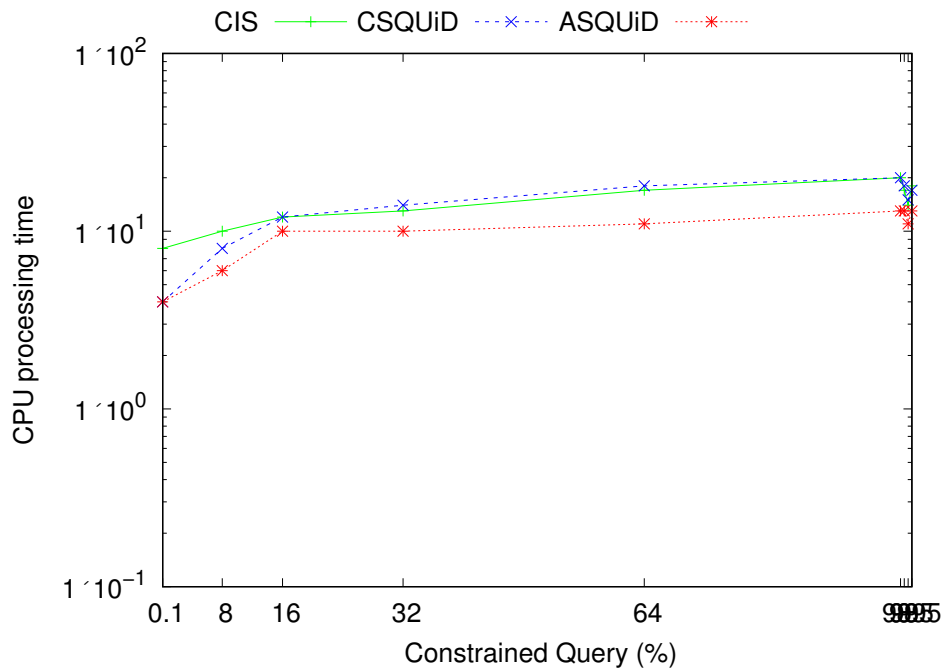

Supplement: SQUiDExperimentalResults.zip [file SQUiDExperimentalResults.zip]

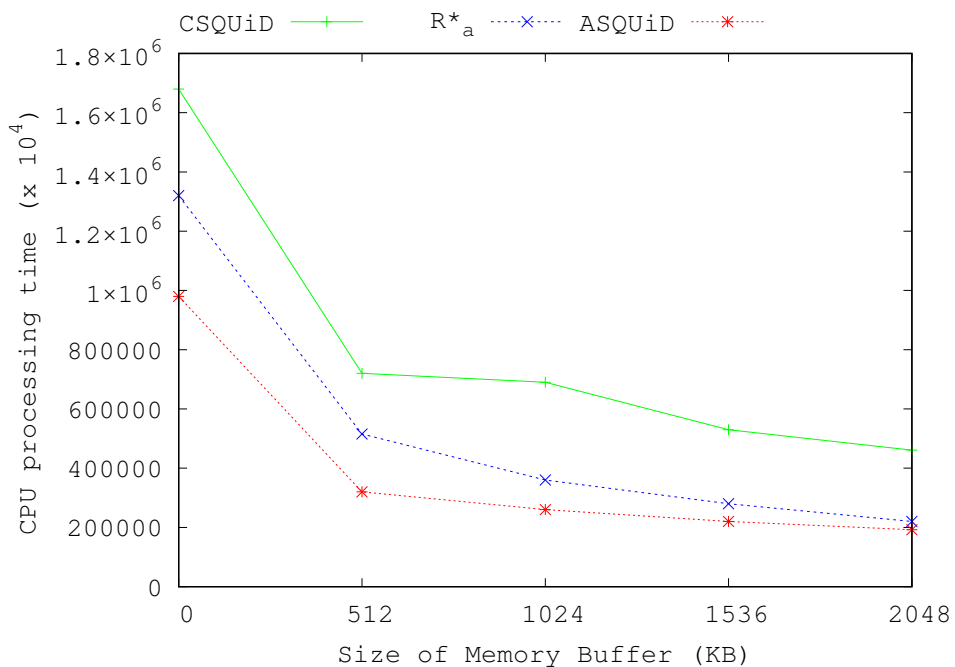

Supplement: SQUiDExperimentalResults.zip [file SQUiDExperimentalResults.zip]

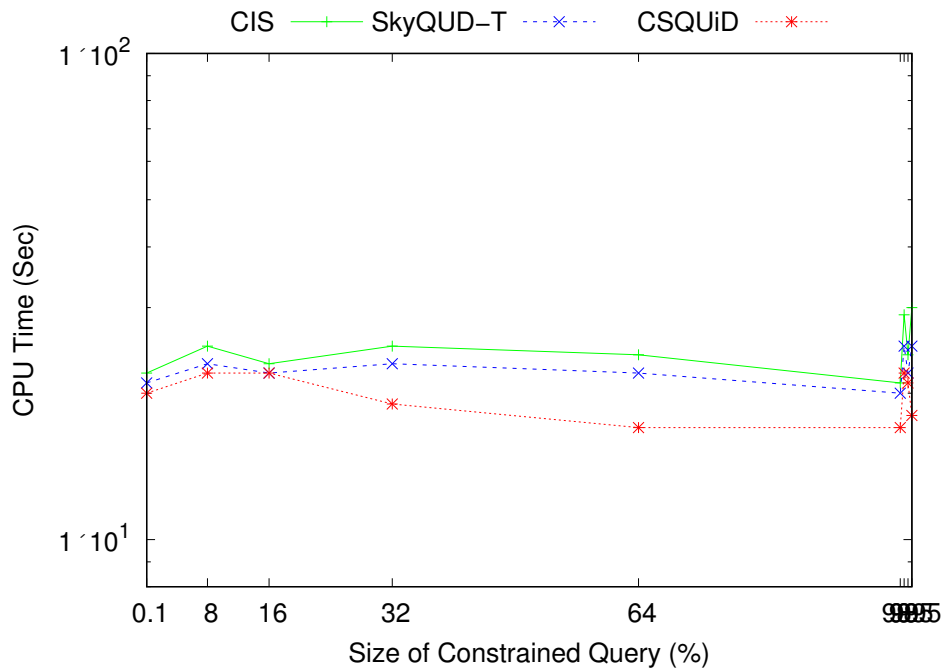

Supplement: SQUiDExperimentalResults.zip [file SQUiDExperimentalResults.zip]

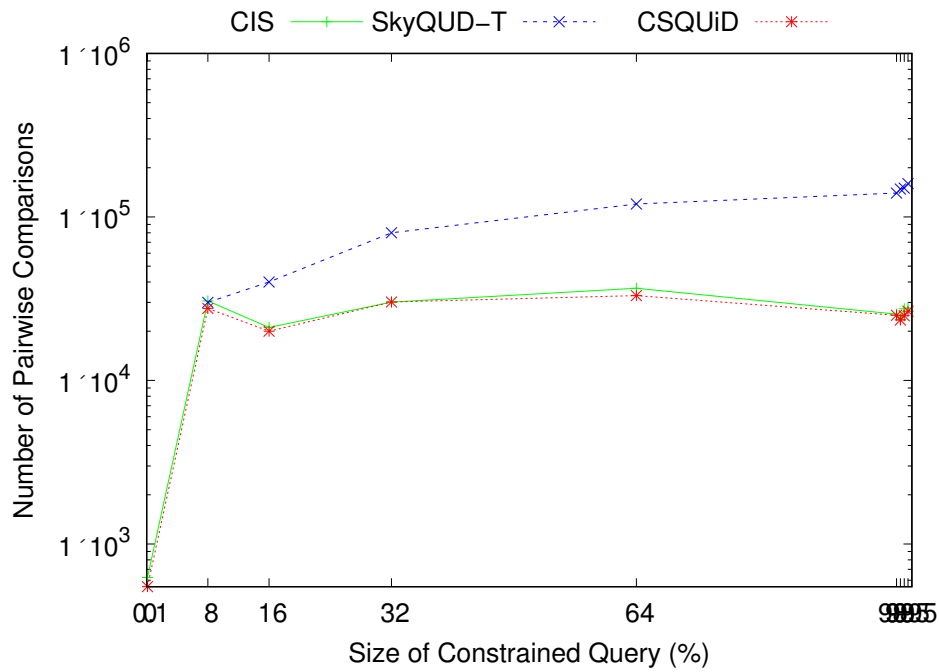

Supplement: SQUiDExperimentalResults.zip [file SQUiDExperimentalResults.zip]

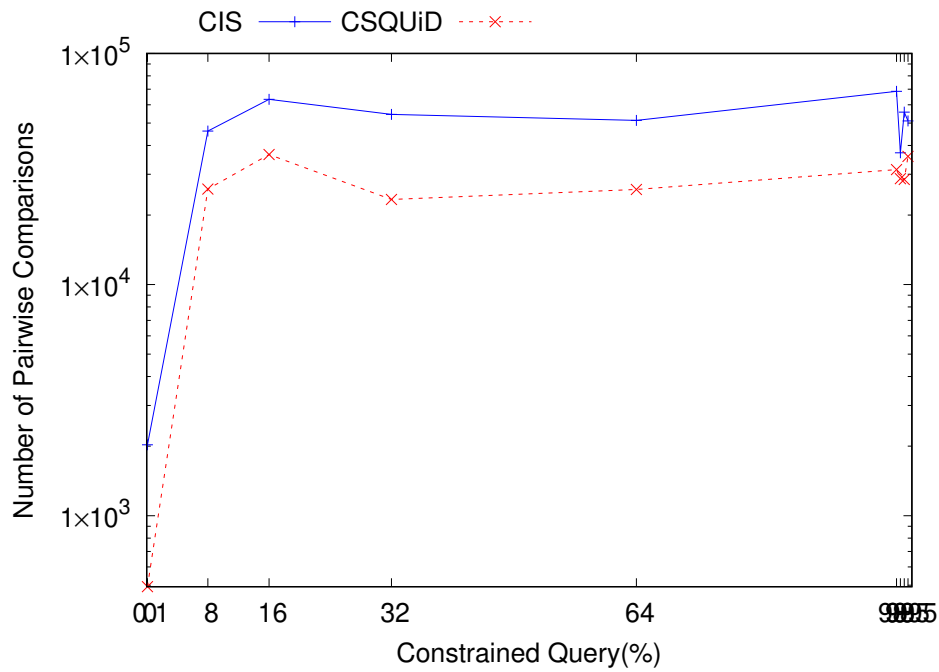

Supplement: SQUiDExperimentalResults.zip [file SQUiDExperimentalResults.zip]

Number of Pairwise Comparisons

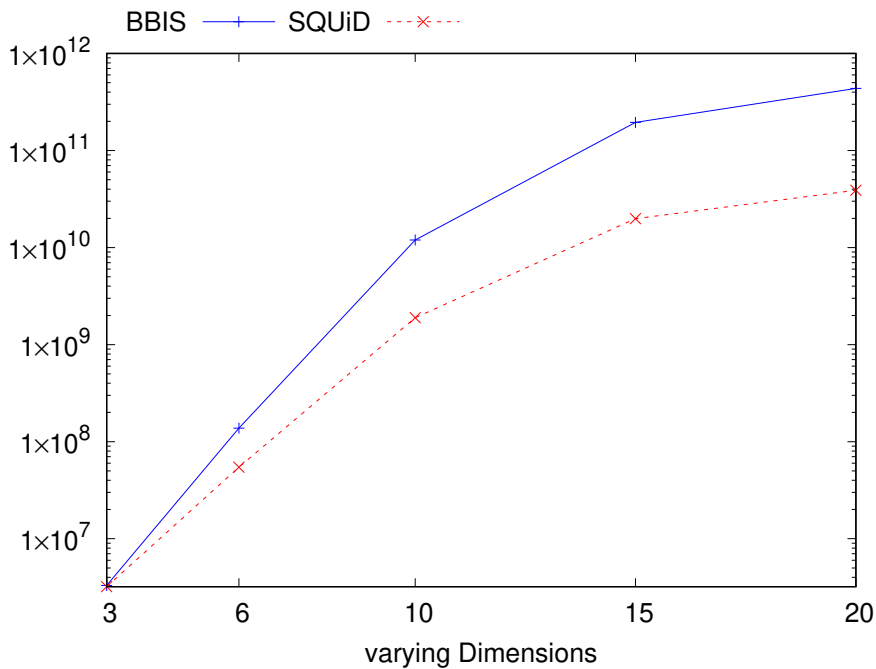

Supplement: SQUiDExperimentalResults.zip [file SQUiDExperimentalResults.zip]

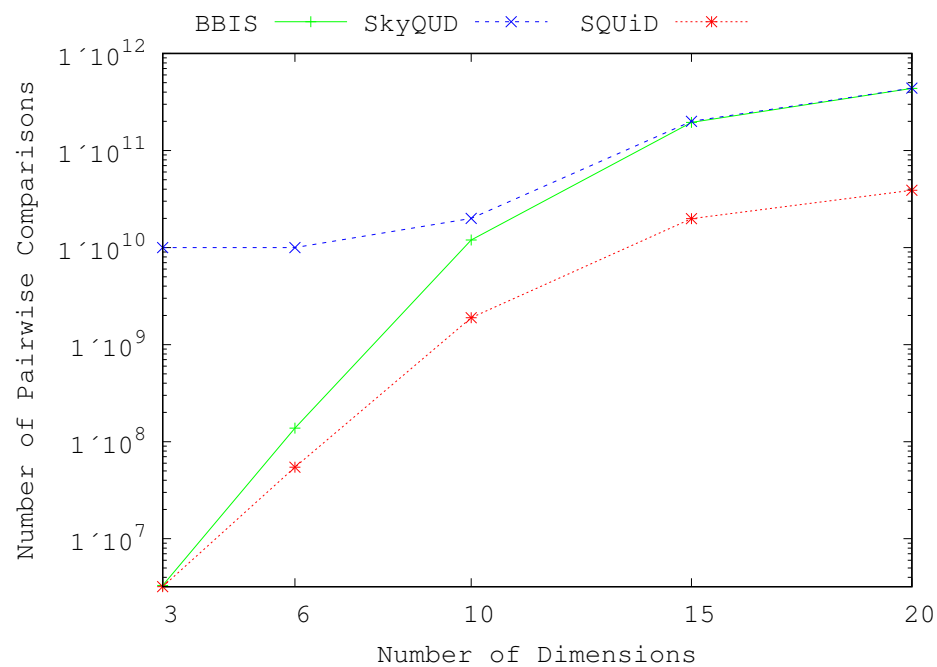

Supplement: SQUiDExperimentalResults.zip [file SQUiDExperimentalResults.zip]

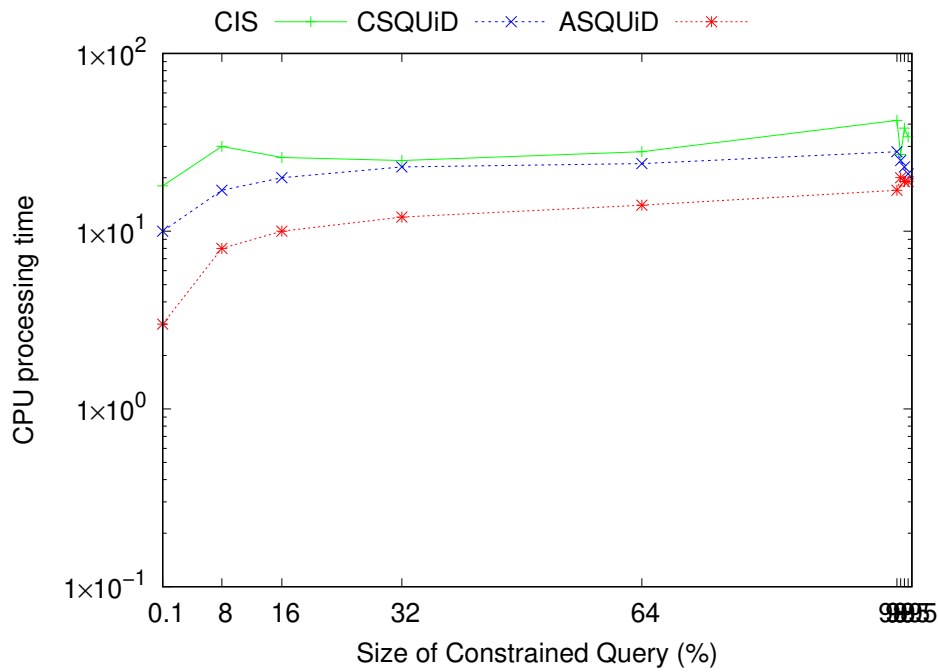

Supplement: SQUiDExperimentalResults.zip [file SQUiDExperimentalResults.zip]

Number of Pairwise Comparisons

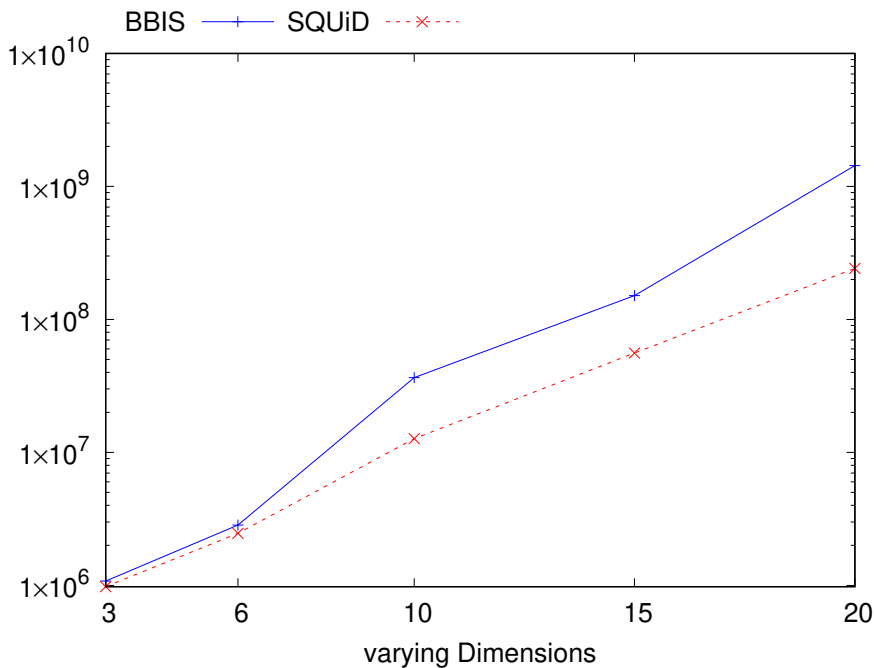

Supplement: SQUiDExperimentalResults.zip [file SQUiDExperimentalResults.zip]

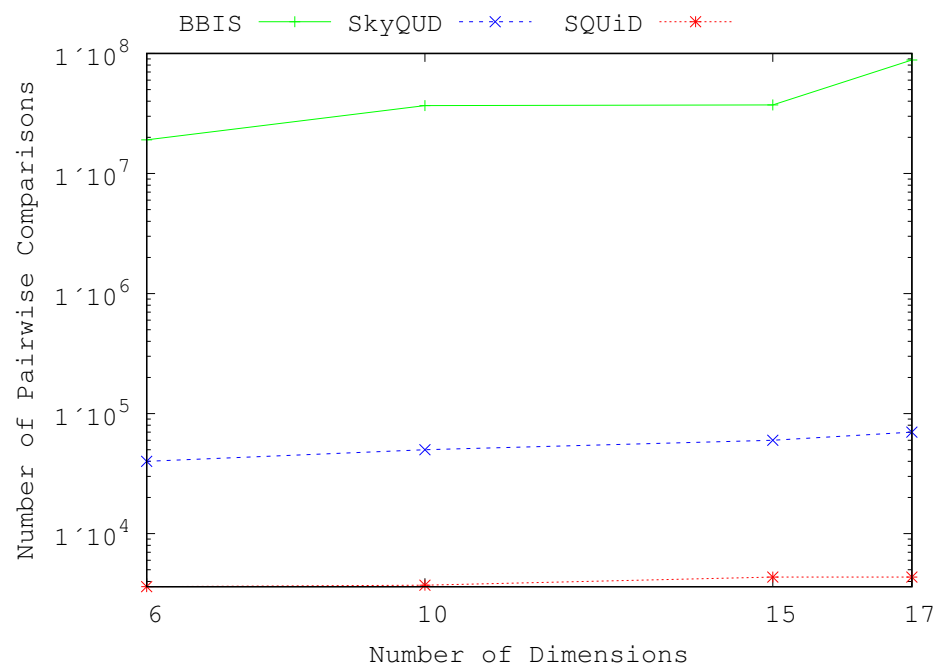

Supplement: SQUiDExperimentalResults.zip [file SQUiDExperimentalResults.zip]

Number of Pairwise Comparisons

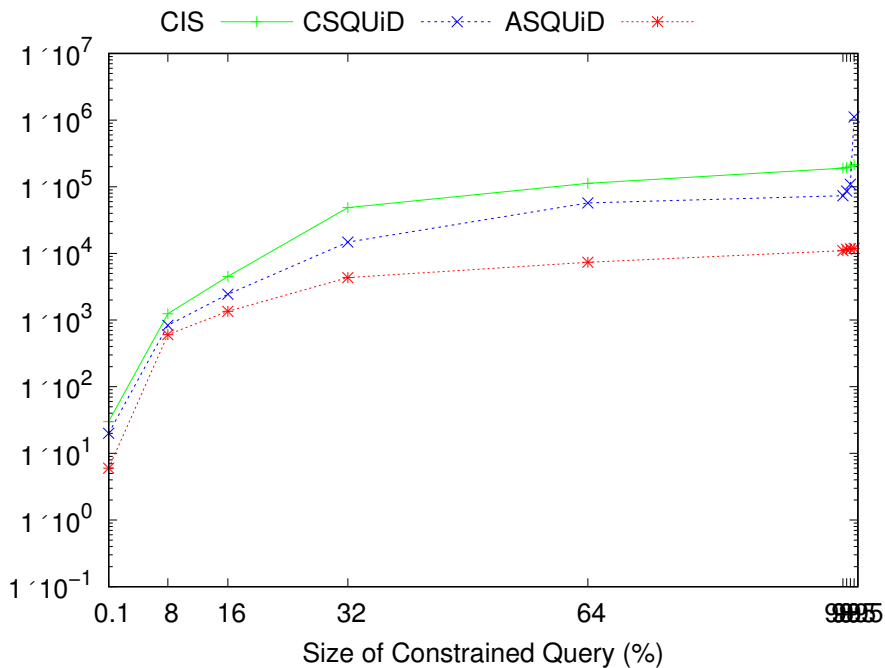

Supplement: SQUiDExperimentalResults.zip [file SQUiDExperimentalResults.zip]

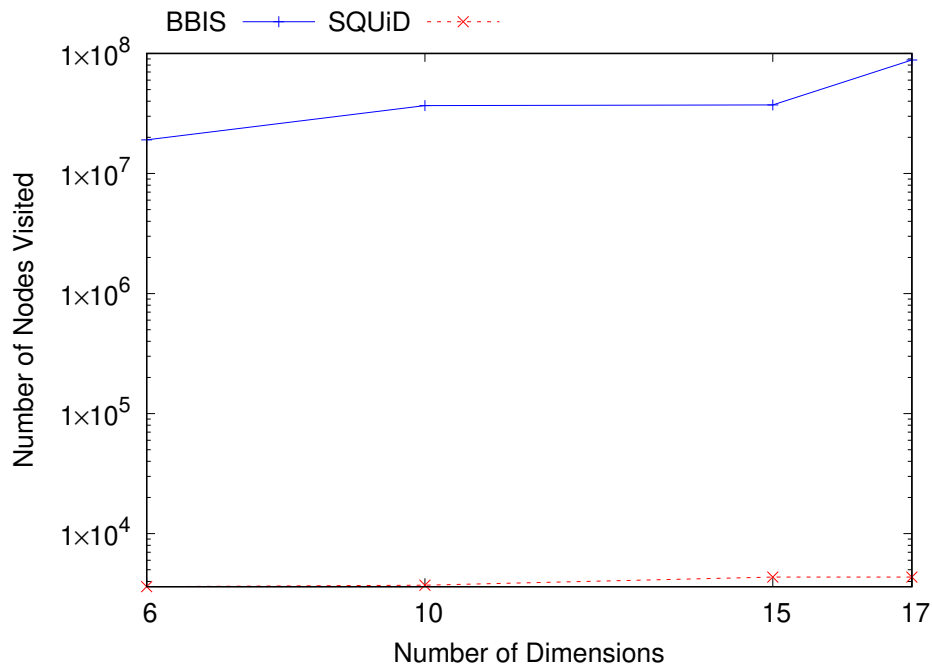

Supplement: SQUiDExperimentalResults.zip [file SQUiDExperimentalResults.zip]

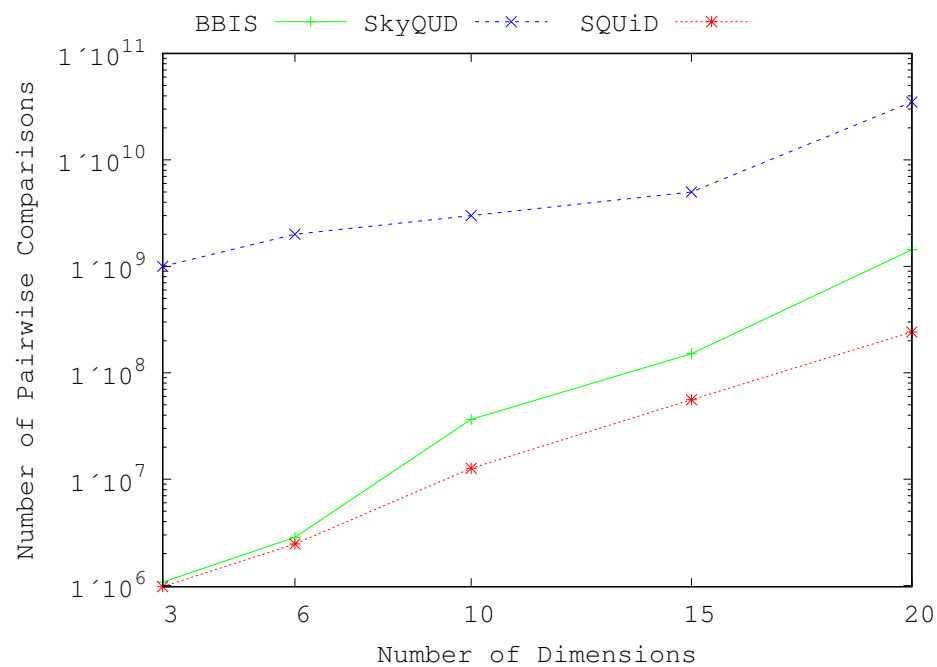

Supplement: SQUiDExperimentalResults.zip [file SQUiDExperimentalResults.zip]

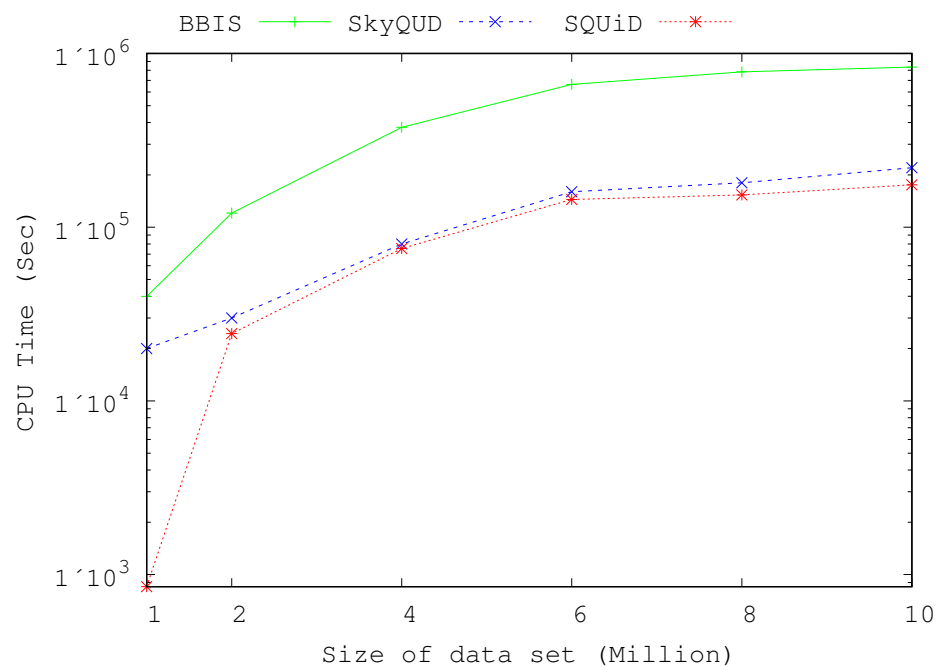

Supplement: SQUiDExperimentalResults.zip [file SQUiDExperimentalResults.zip]

Number of Pairwise Comparisons

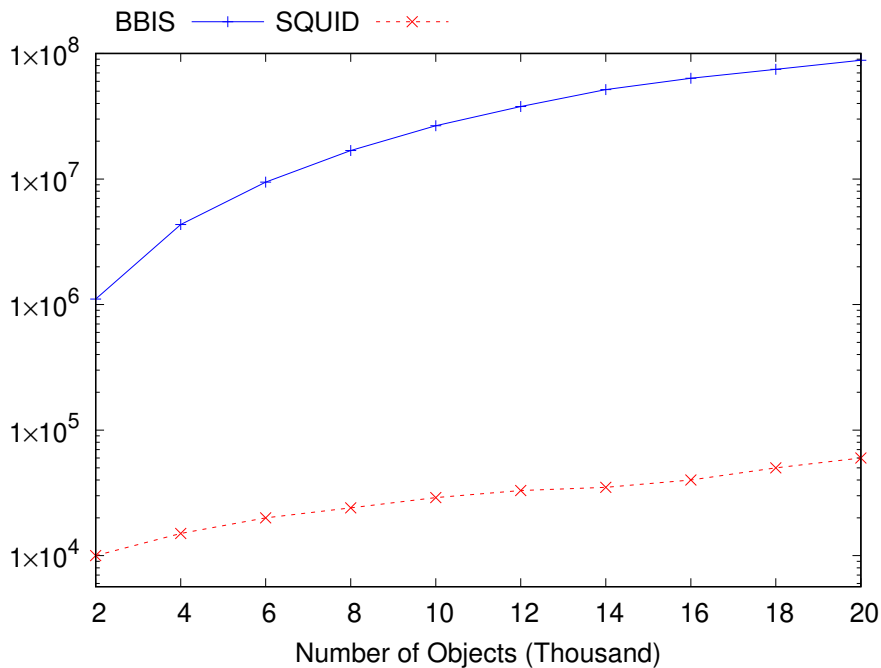

Supplement: SQUiDExperimentalResults.zip [file SQUiDExperimentalResults.zip]

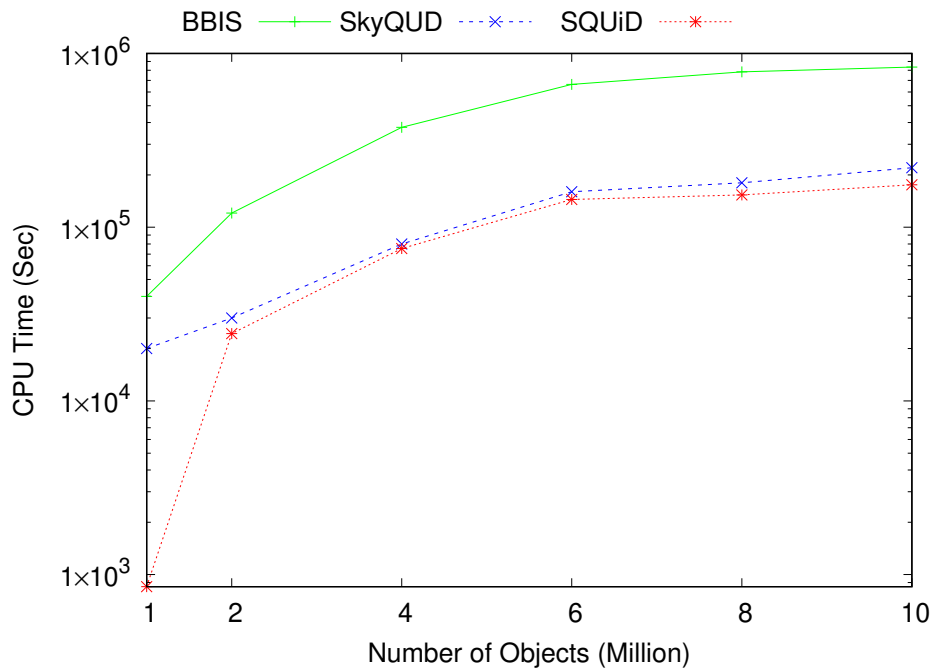

Supplement: SQUiDExperimentalResults.zip [file SQUiDExperimentalResults.zip]

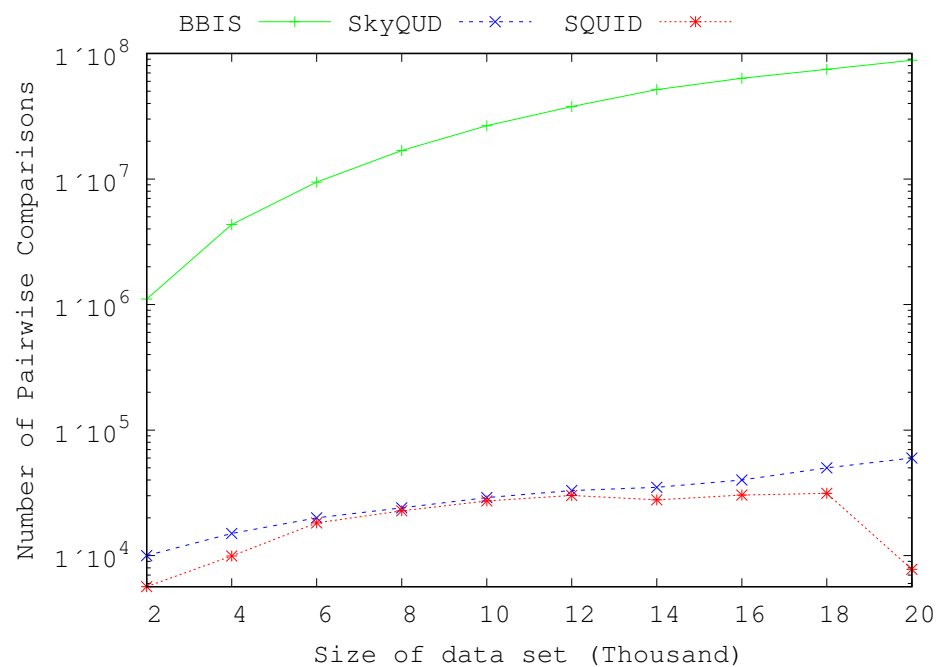

Supplement: SQUiDExperimentalResults.zip [file SQUiDExperimentalResults.zip]

Number of Pairwise Comparisons

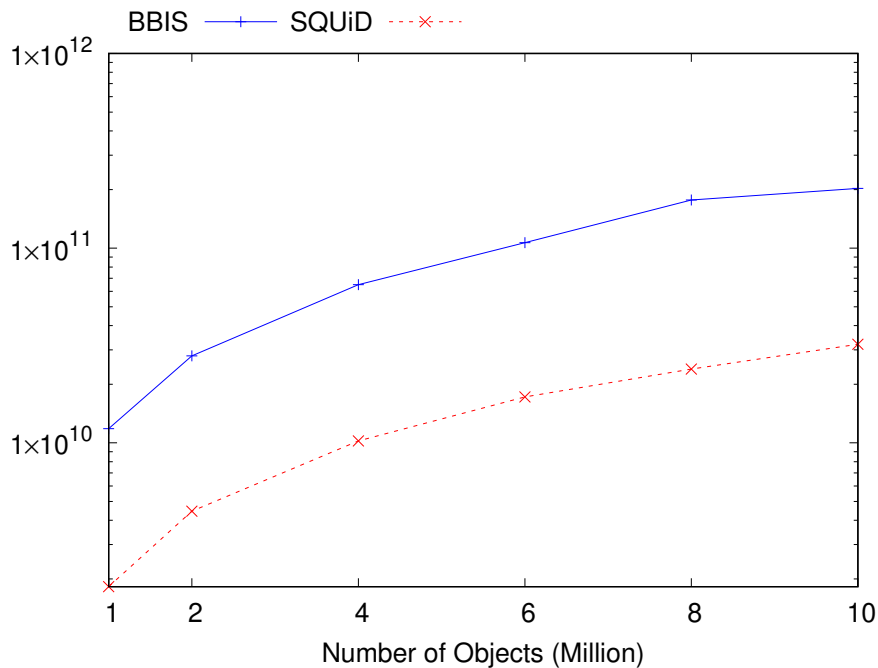

Supplement: SQUiDExperimentalResults.zip [file SQUiDExperimentalResults.zip]

Number of Pairwise Comparisons

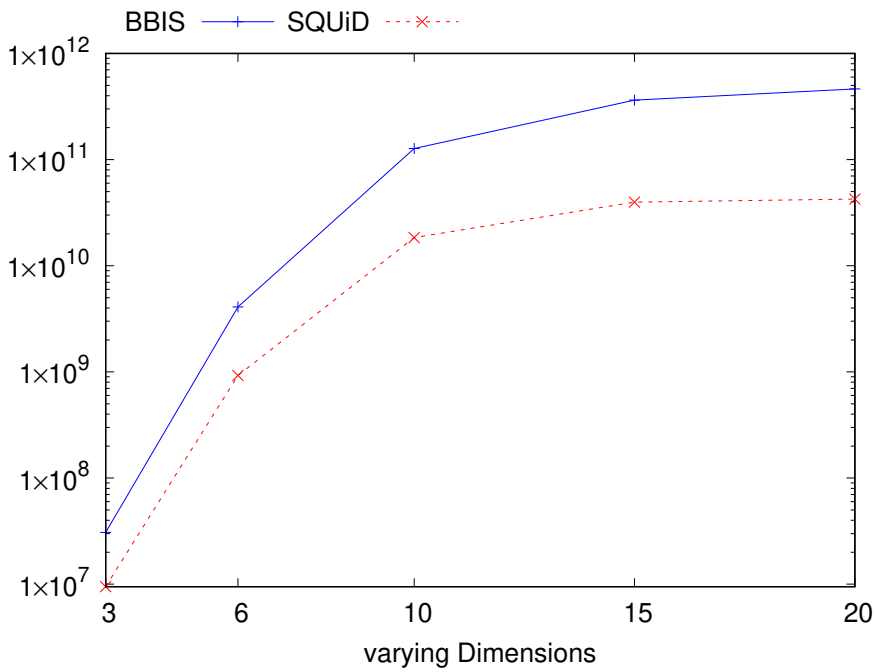

Supplement: SQUiDExperimentalResults.zip [file SQUiDExperimentalResults.zip]

Number of Pairwise Comparisons

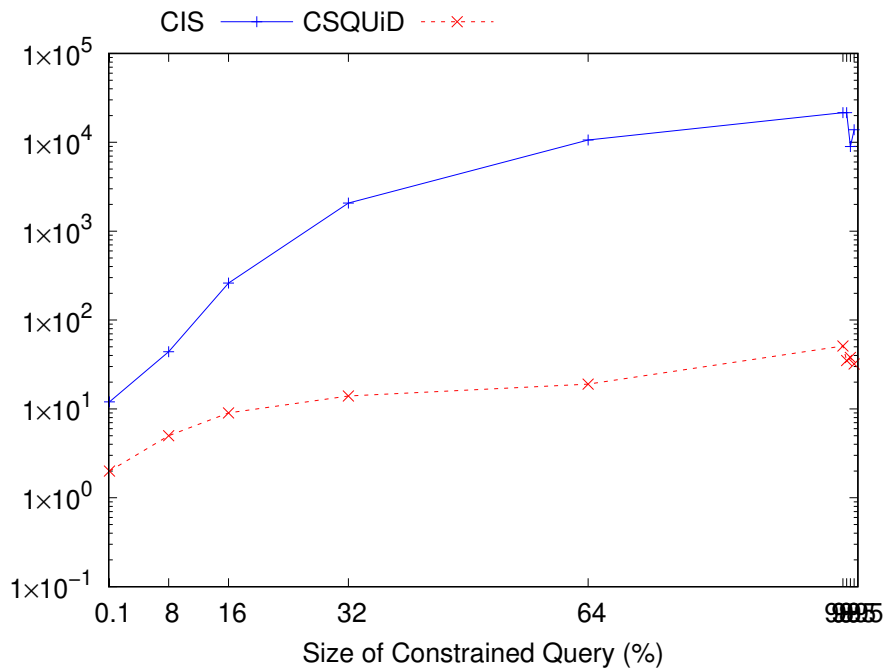

Supplement: SQUiDExperimentalResults.zip [file SQUiDExperimentalResults.zip]

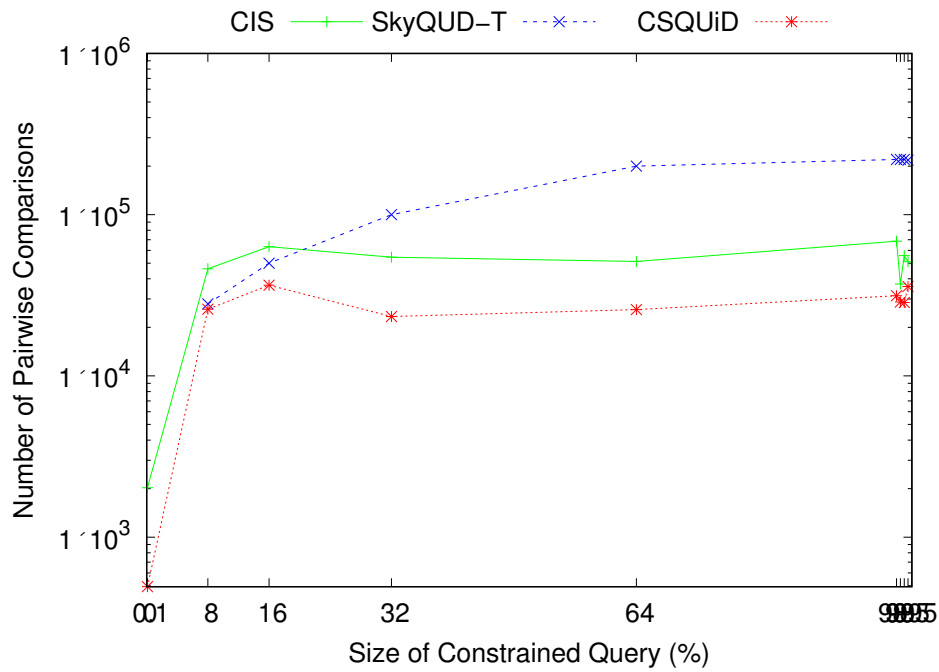

Supplement: SQUiDExperimentalResults.zip [file SQUiDExperimentalResults.zip]

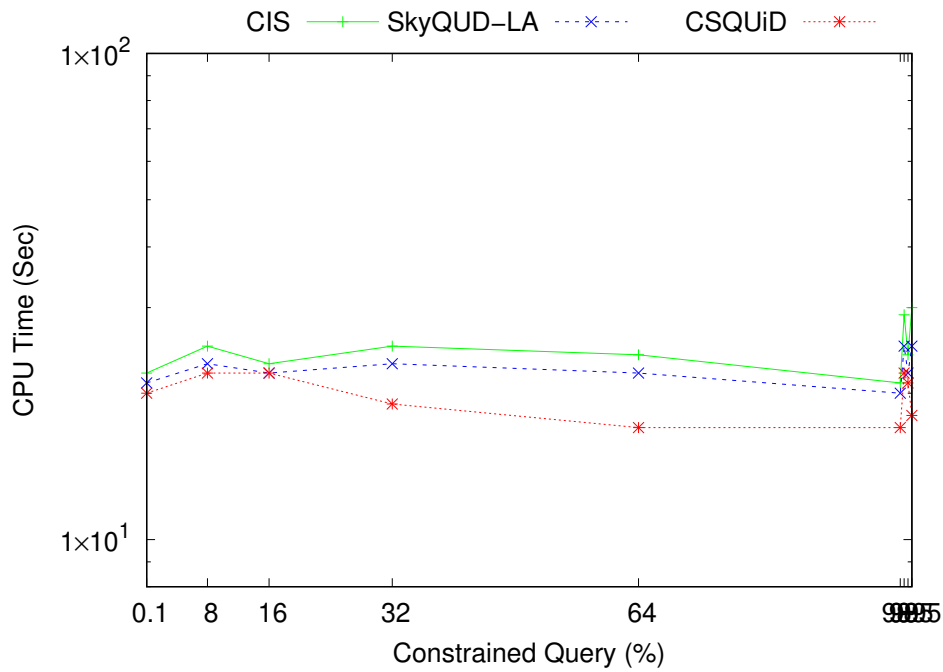

Supplement: SQUiDExperimentalResults.zip [file SQUiDExperimentalResults.zip]

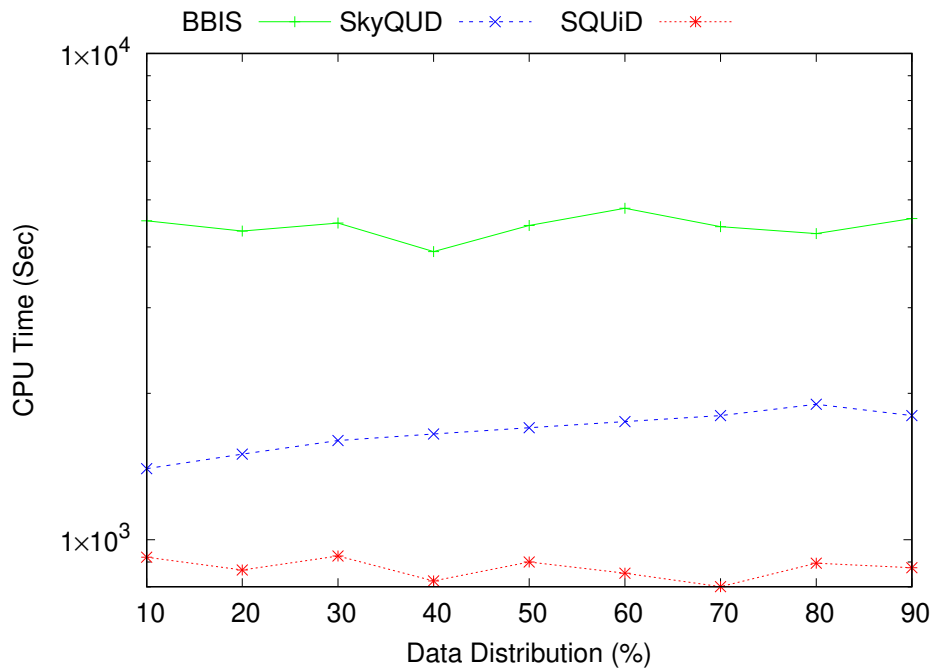

Supplement: SQUiDExperimentalResults.zip [file SQUiDExperimentalResults.zip]

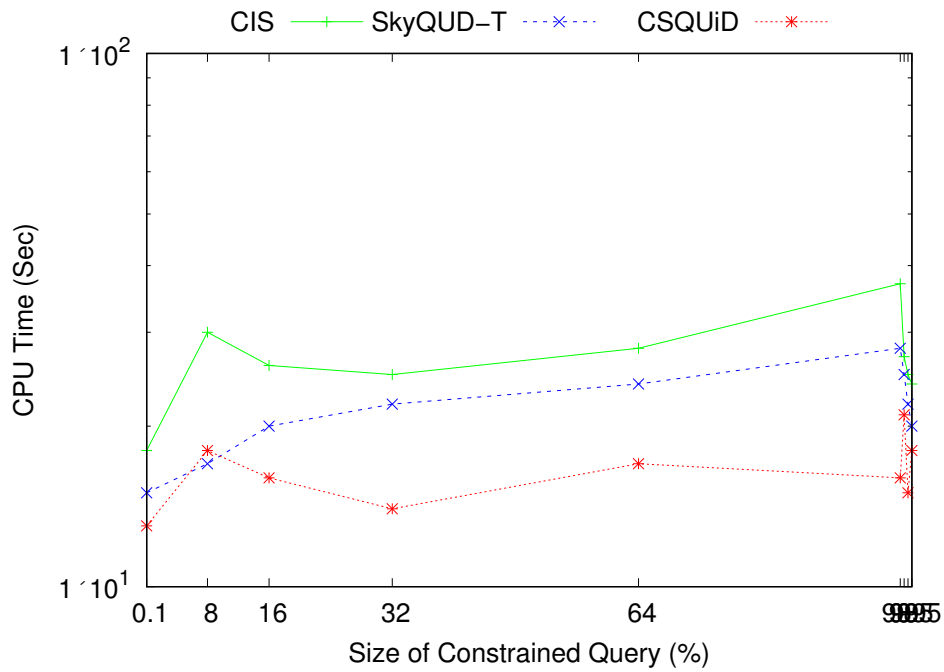

Supplement: SQUiDExperimentalResults.zip [file SQUiDExperimentalResults.zip]

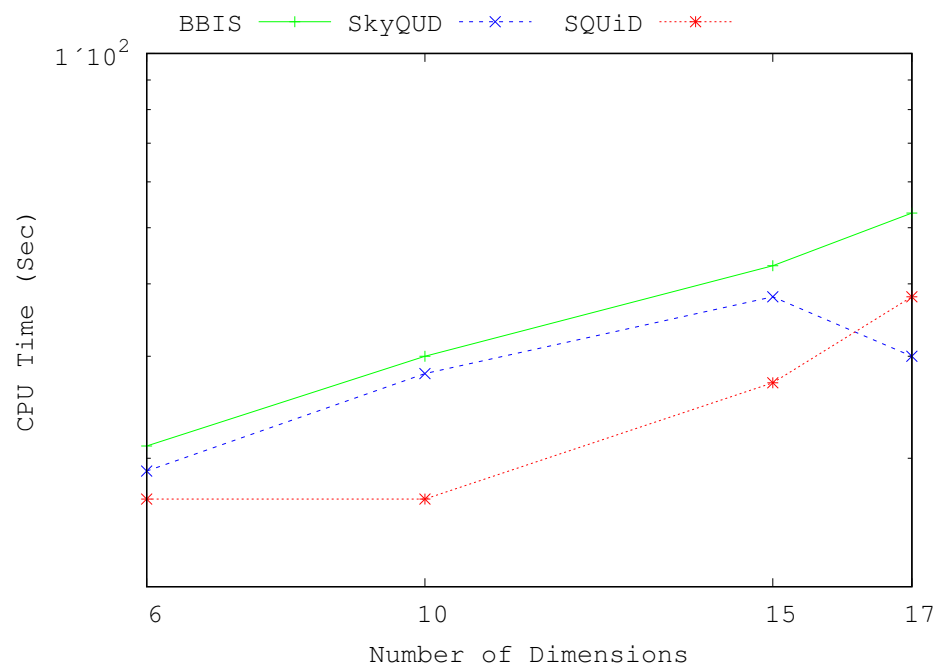

Supplement: SQUiDExperimentalResults.zip [file SQUiDExperimentalResults.zip]

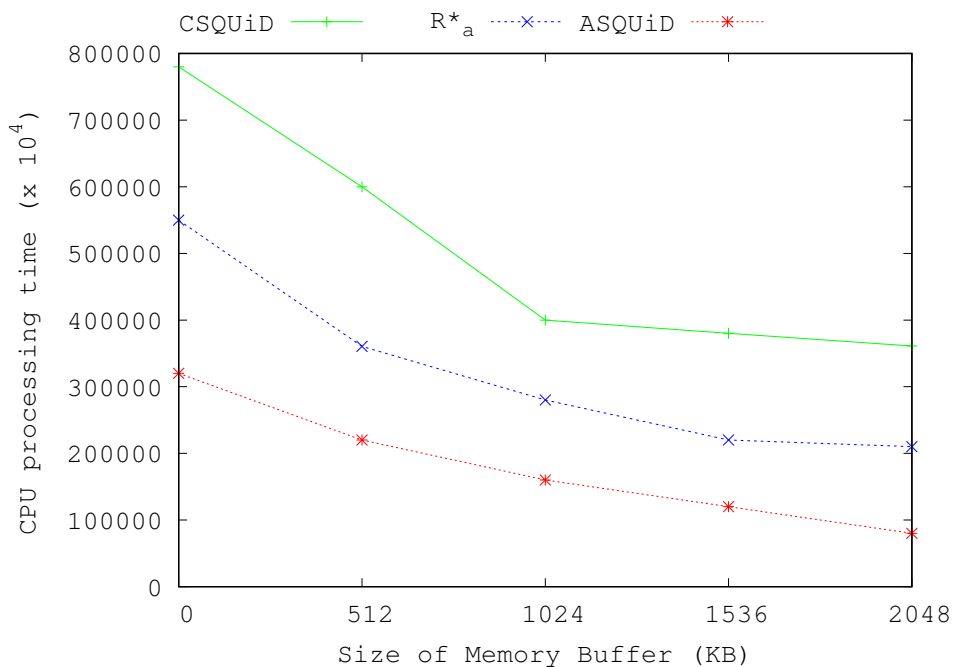

Supplement: SQUiDExperimentalResults.zip [file SQUiDExperimentalResults.zip]

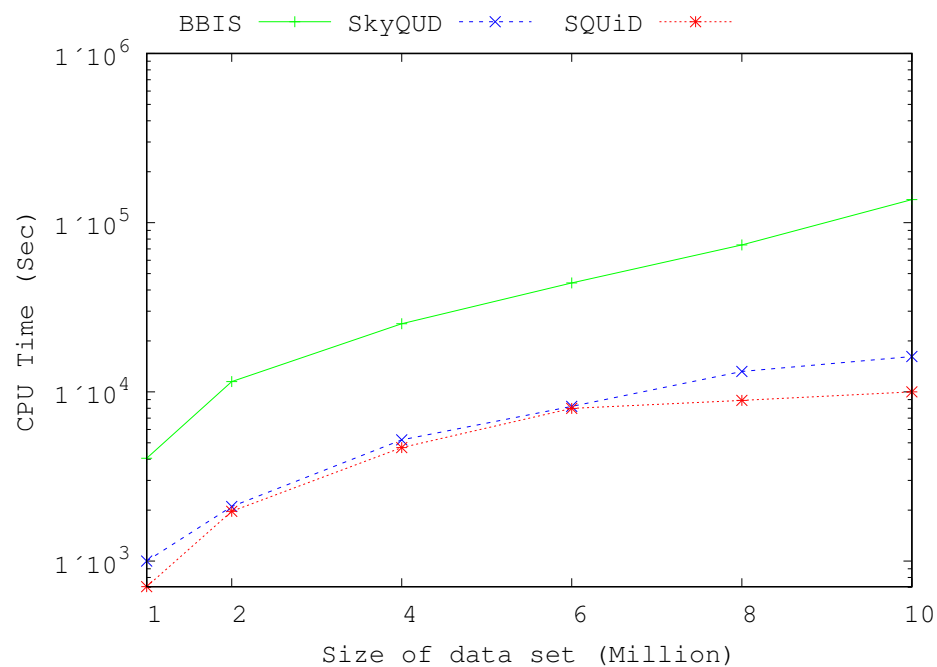

Supplement: SQUiDExperimentalResults.zip [file SQUiDExperimentalResults.zip]

Number of Pairwise Comparisons

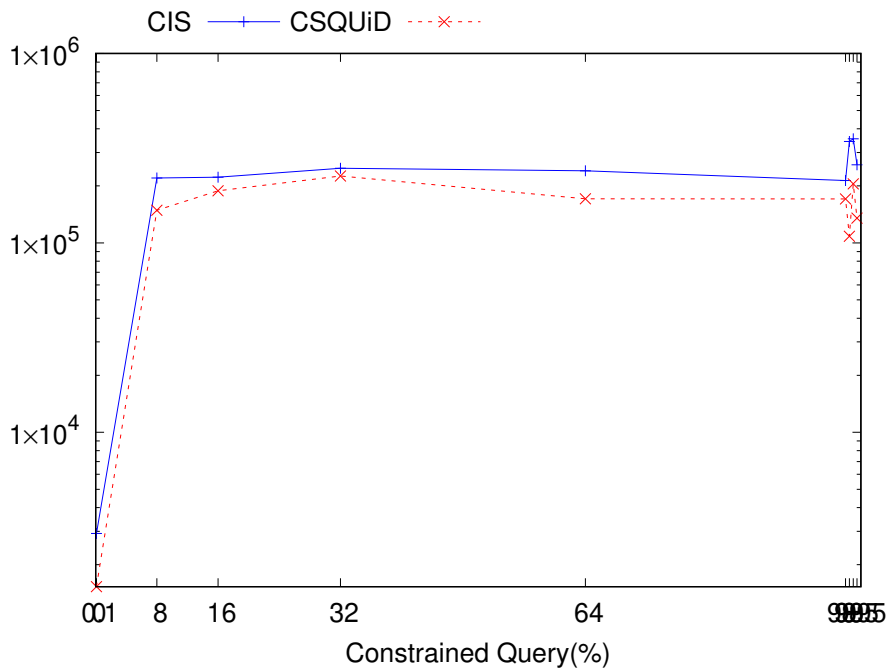

Supplement: SQUiDExperimentalResults.zip [file SQUiDExperimentalResults.zip]

Number of Pairwise Comparisons

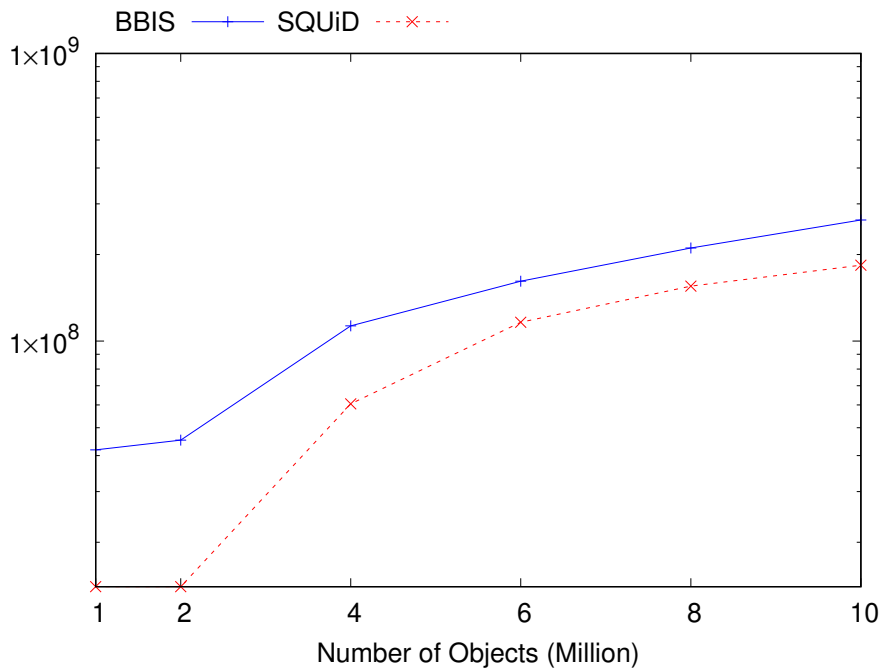

Supplement: SQUiDExperimentalResults.zip [file SQUiDExperimentalResults.zip]

Number of Pairwise Comparisons

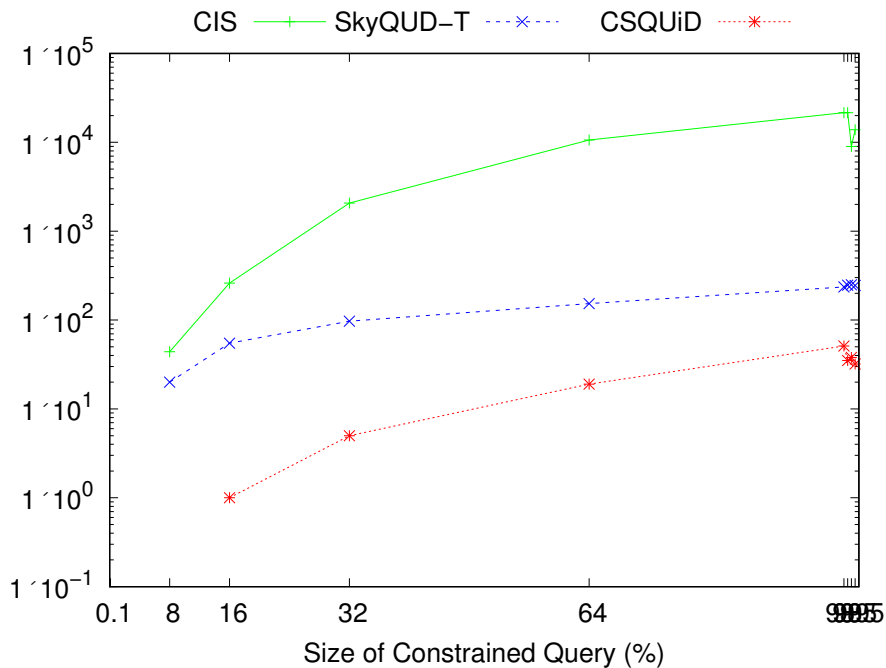

Supplement: SQUiDExperimentalResults.zip [file SQUiDExperimentalResults.zip]

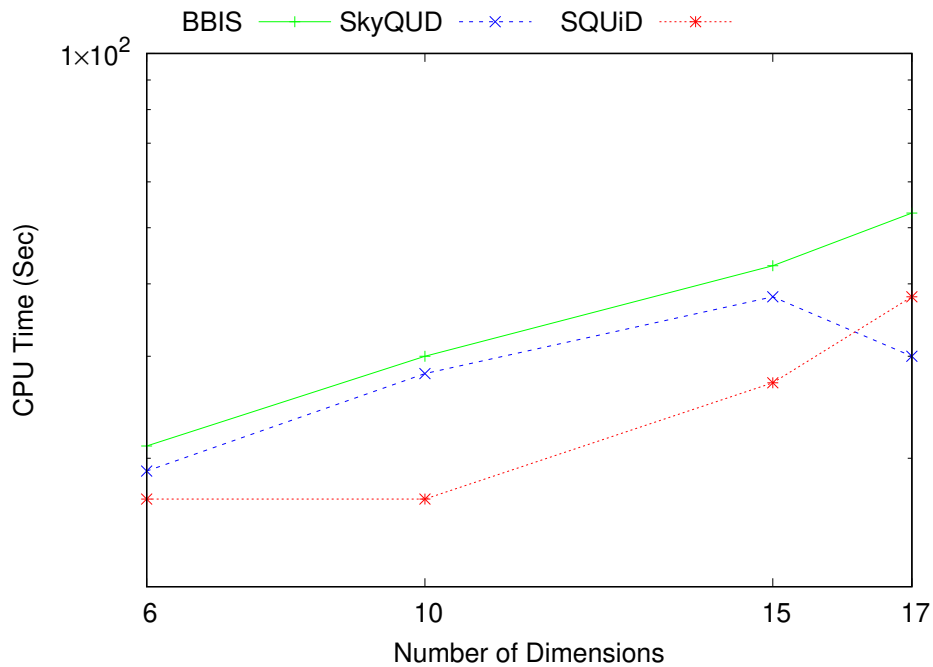

Supplement: SQUiDExperimentalResults.zip [file SQUiDExperimentalResults.zip]

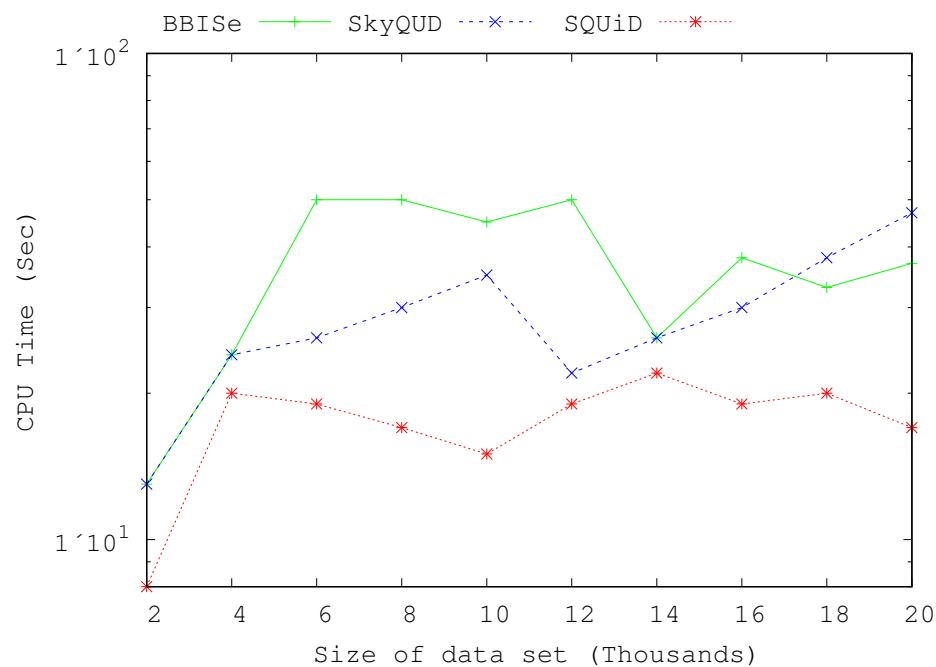

Supplement: SQUiDExperimentalResults.zip [file SQUiDExperimentalResults.zip]

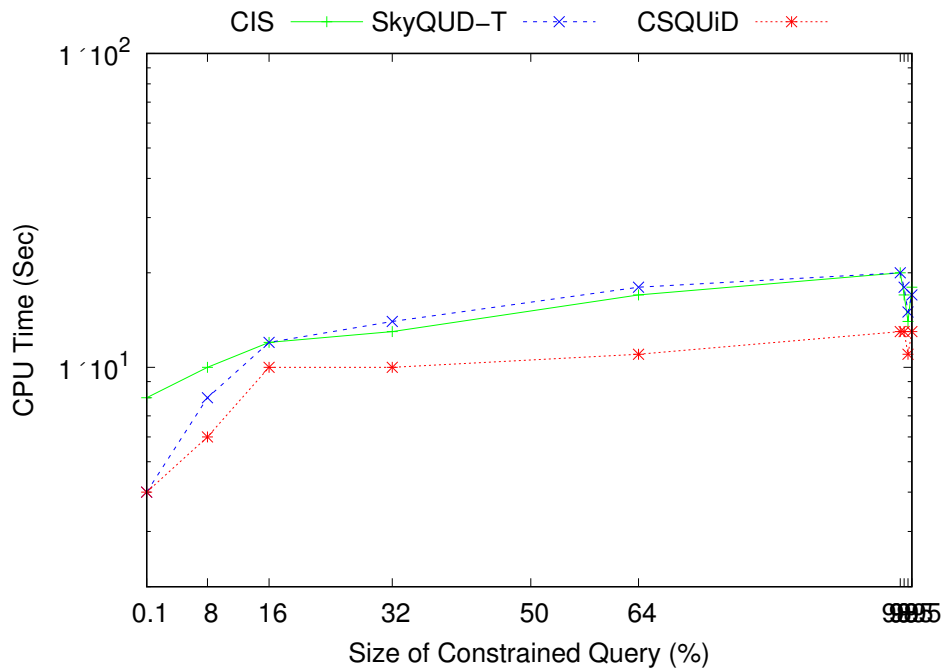

Supplement: SQUiDExperimentalResults.zip [file SQUiDExperimentalResults.zip]

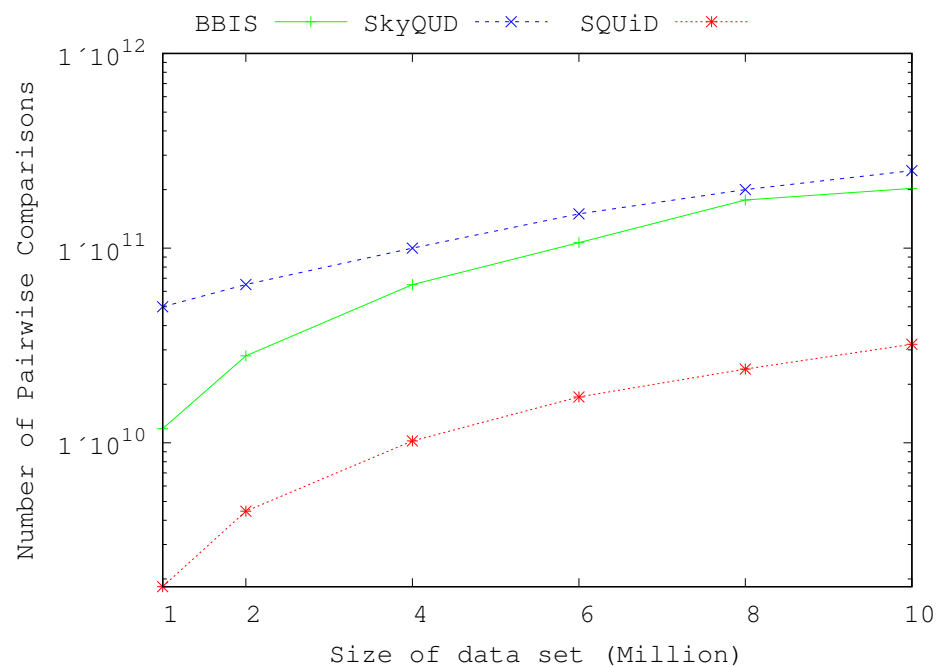

Supplement: SQUiDExperimentalResults.zip [file SQUiDExperimentalResults.zip]

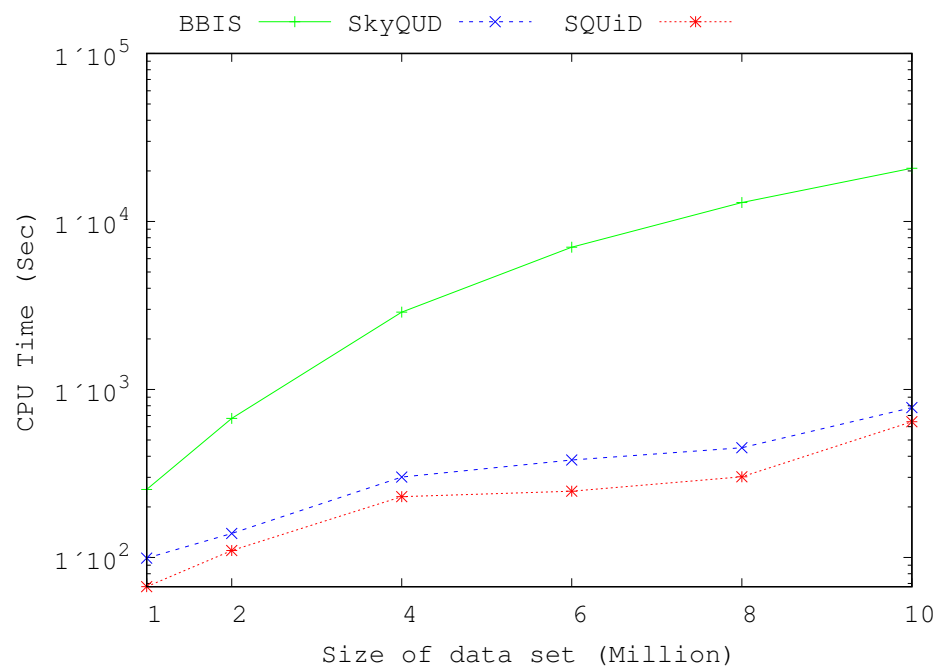

Supplement: SQUiDExperimentalResults.zip [file SQUiDExperimentalResults.zip]

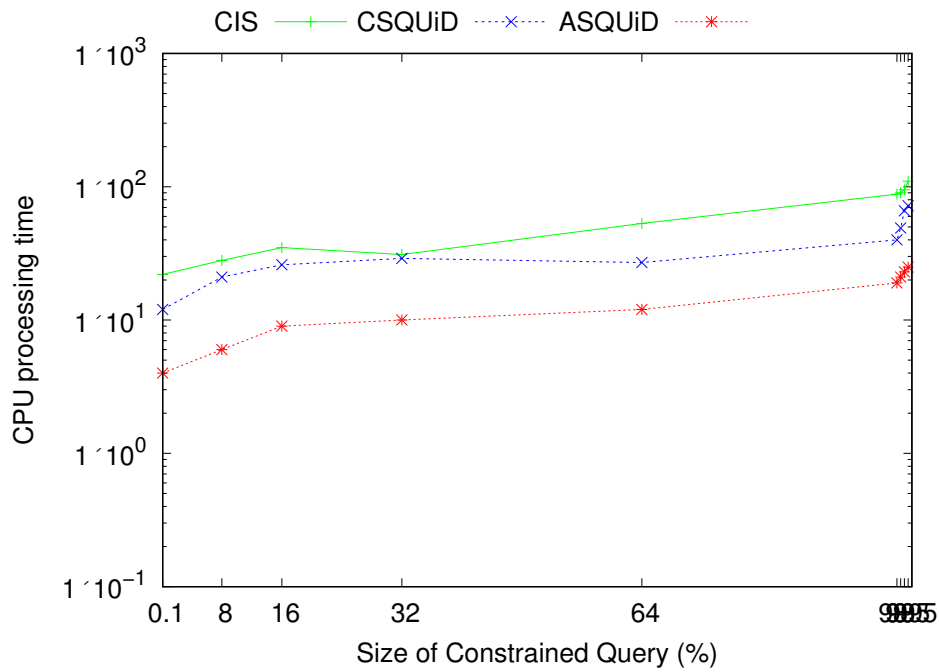

Supplement: SQUiDExperimentalResults.zip [file SQUiDExperimentalResults.zip]

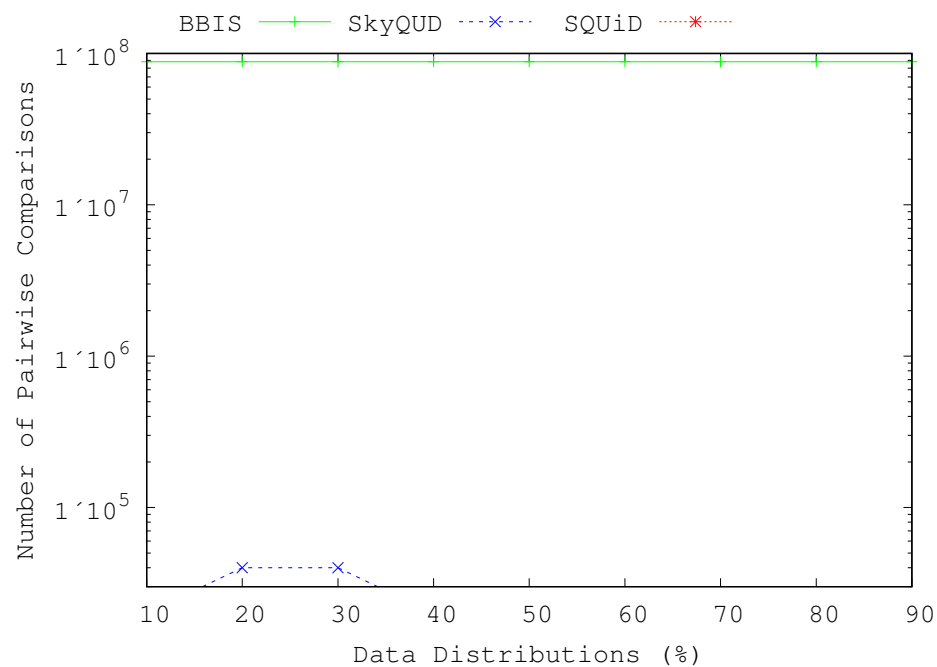

Supplement: SQUiDExperimentalResults.zip [file SQUiDExperimentalResults.zip]

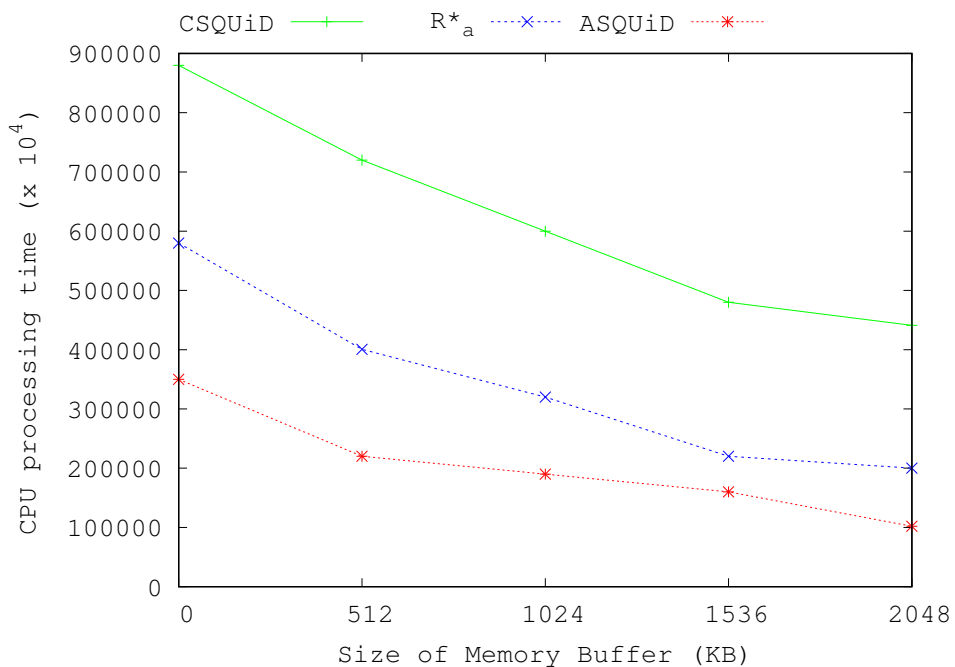

Supplement: SQUiDExperimentalResults.zip [file SQUiDExperimentalResults.zip]

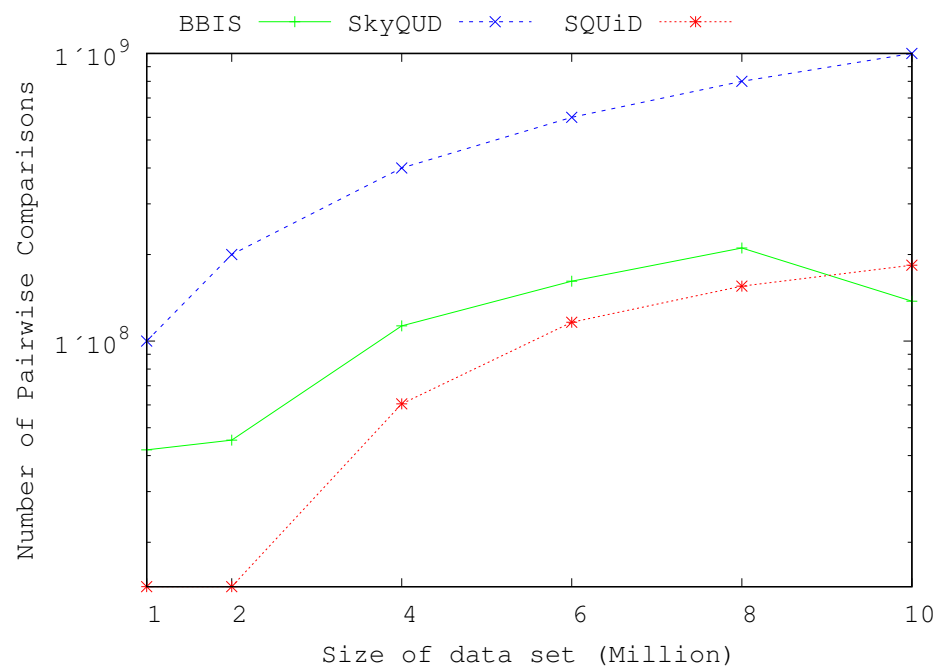

Supplement: SQUiDExperimentalResults.zip [file SQUiDExperimentalResults.zip]

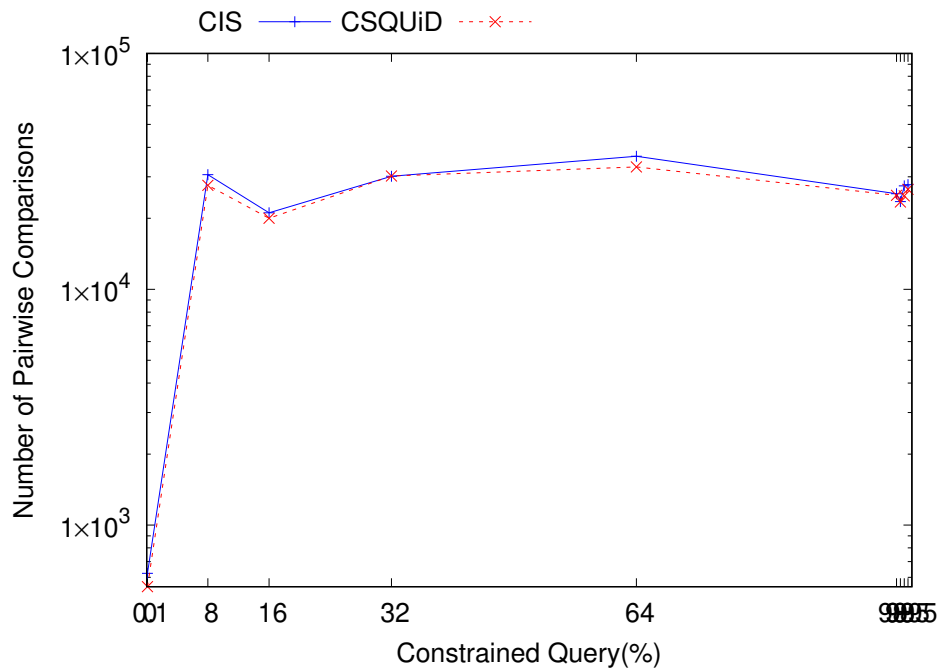

Supplement: SQUiDExperimentalResults.zip [file SQUiDExperimentalResults.zip]

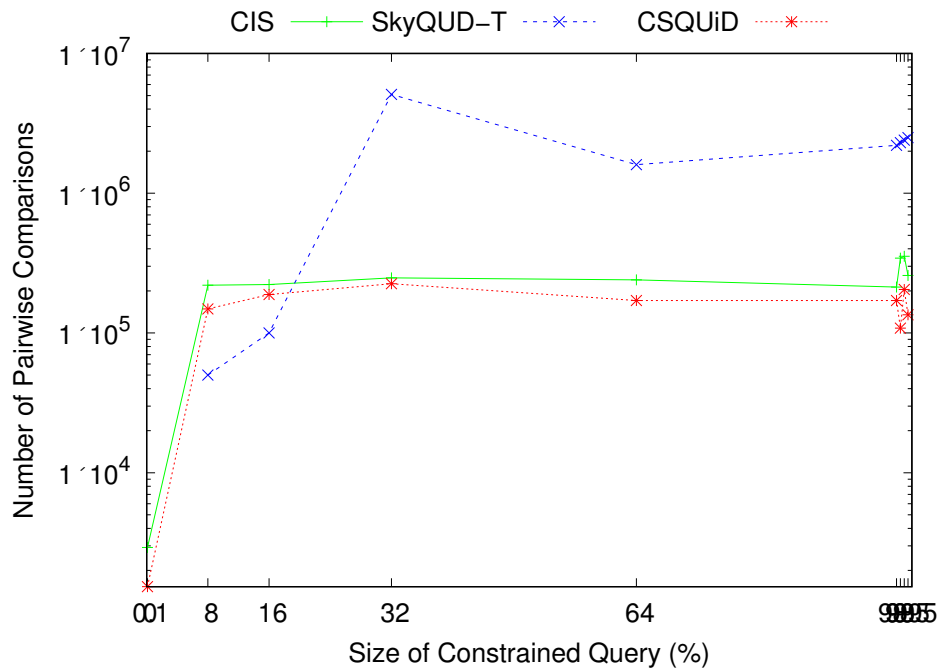

Supplement: SQUiDExperimentalResults.zip [file SQUiDExperimentalResults.zip]

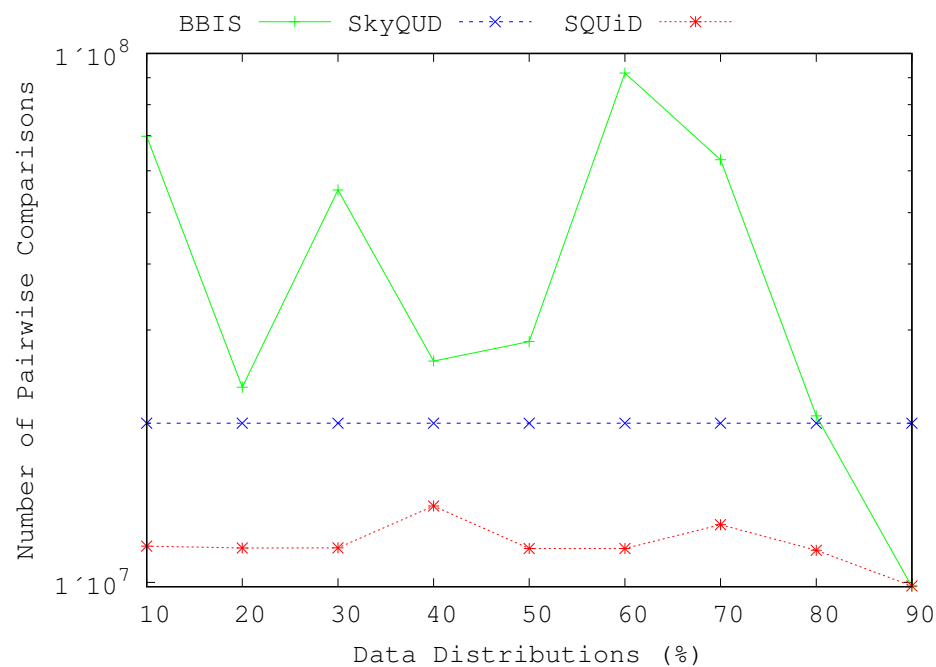

Supplement: SQUiDExperimentalResults.zip [file SQUiDExperimentalResults.zip]

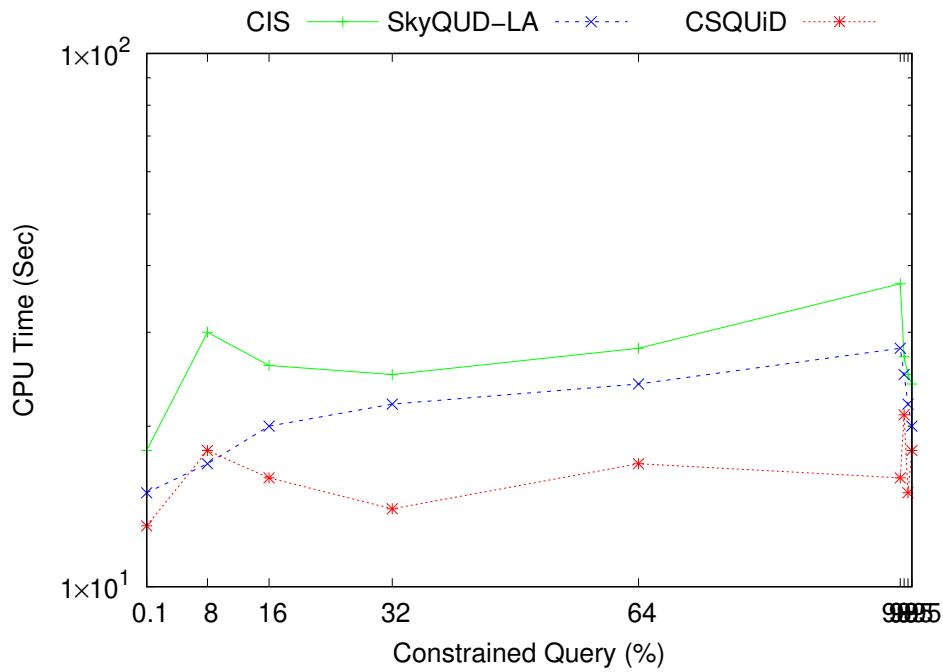

Supplement: SQUiDExperimentalResults.zip [file SQUiDExperimentalResults.zip]

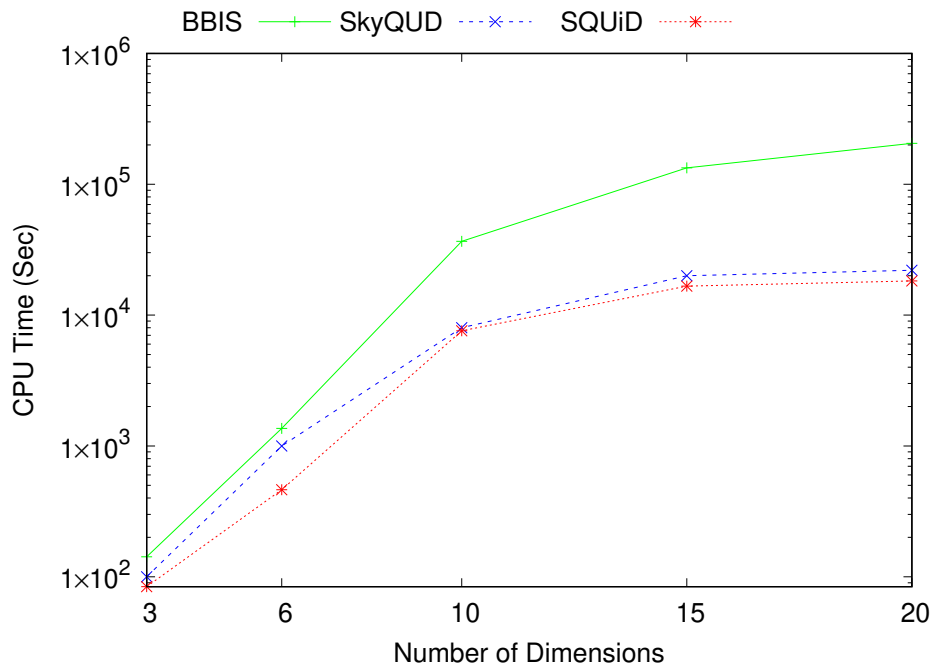

Supplement: SQUiDExperimentalResults.zip [file SQUiDExperimentalResults.zip]

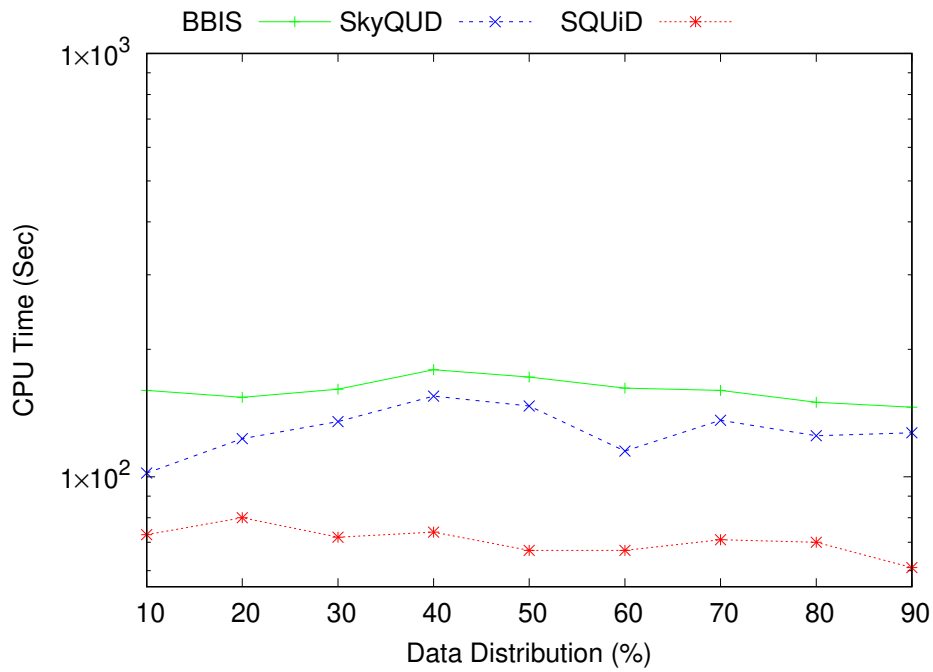

Supplement: SQUiDExperimentalResults.zip [file SQUiDExperimentalResults.zip]

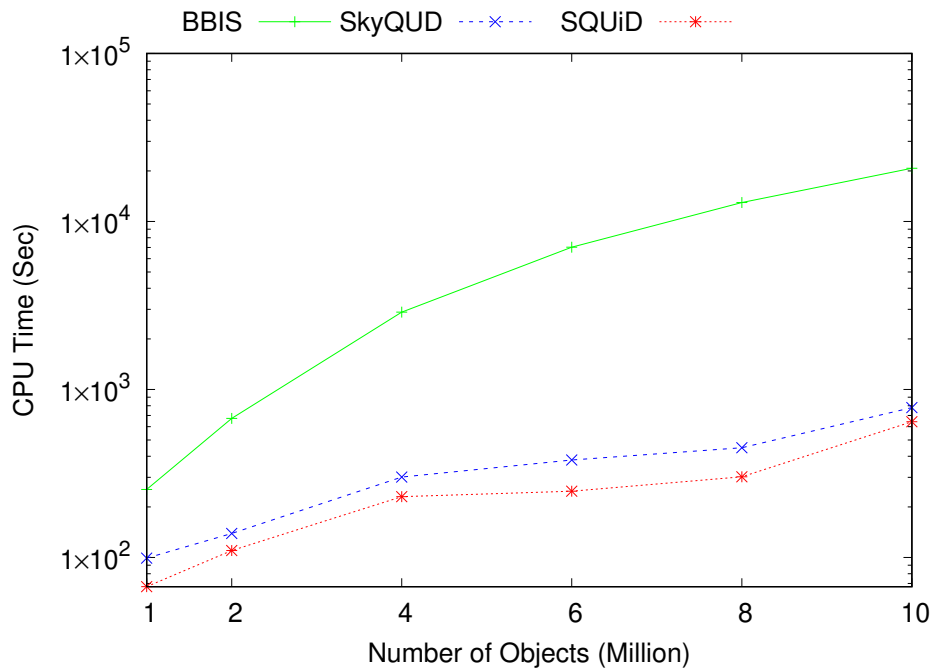

Supplement: SQUiDExperimentalResults.zip [file SQUiDExperimentalResults.zip]

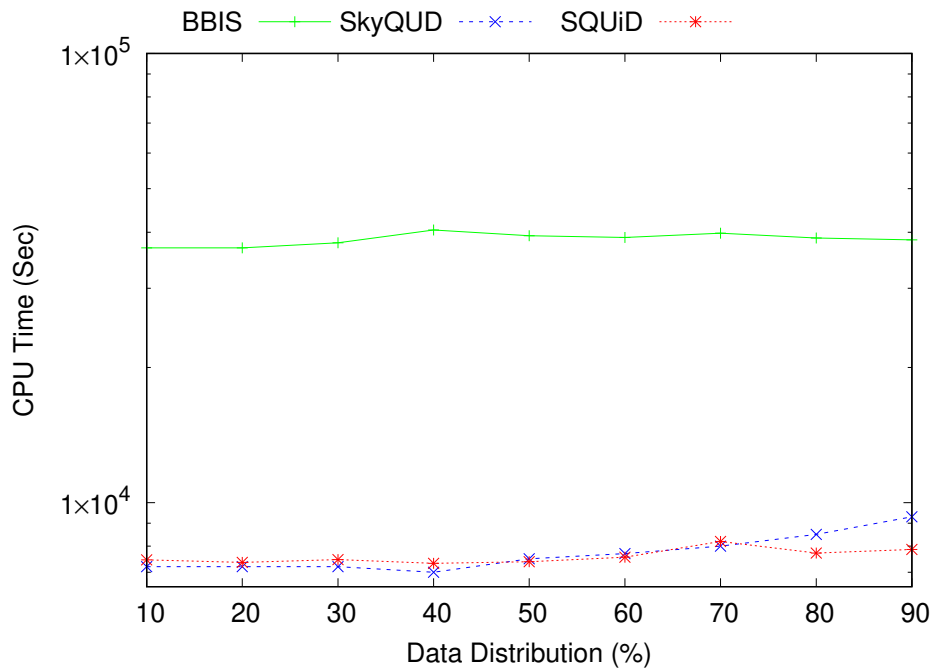

Supplement: SQUiDExperimentalResults.zip [file SQUiDExperimentalResults.zip]

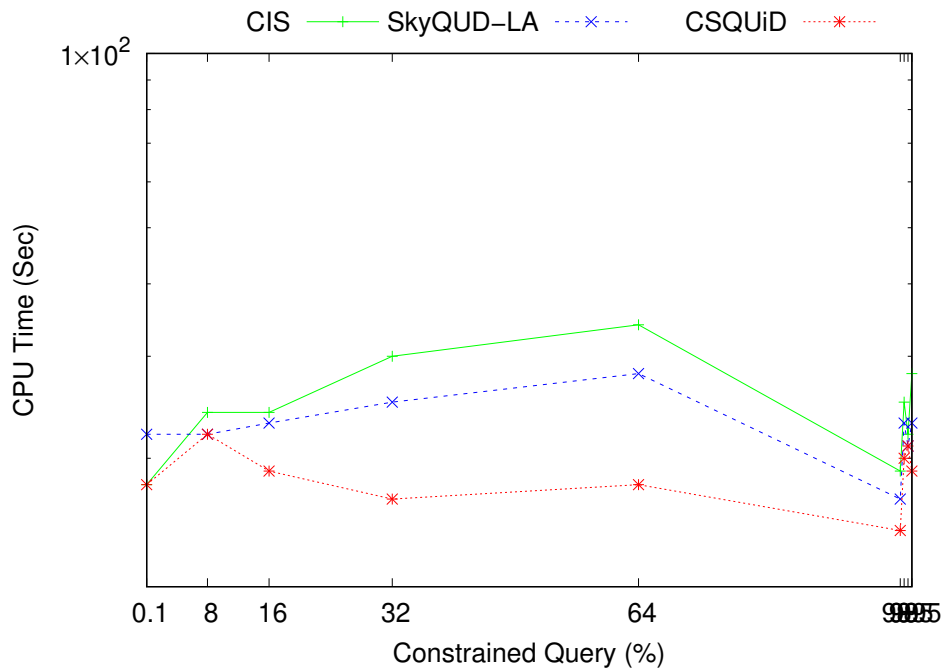

Supplement: SQUiDExperimentalResults.zip [file SQUiDExperimentalResults.zip]

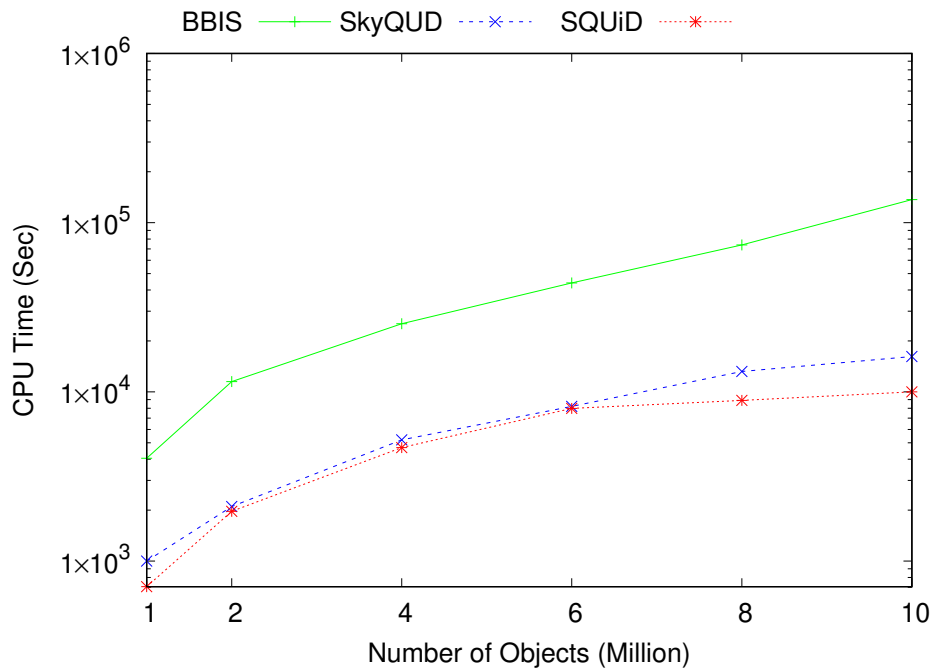

Supplement: SQUiDExperimentalResults.zip [file SQUiDExperimentalResults.zip]

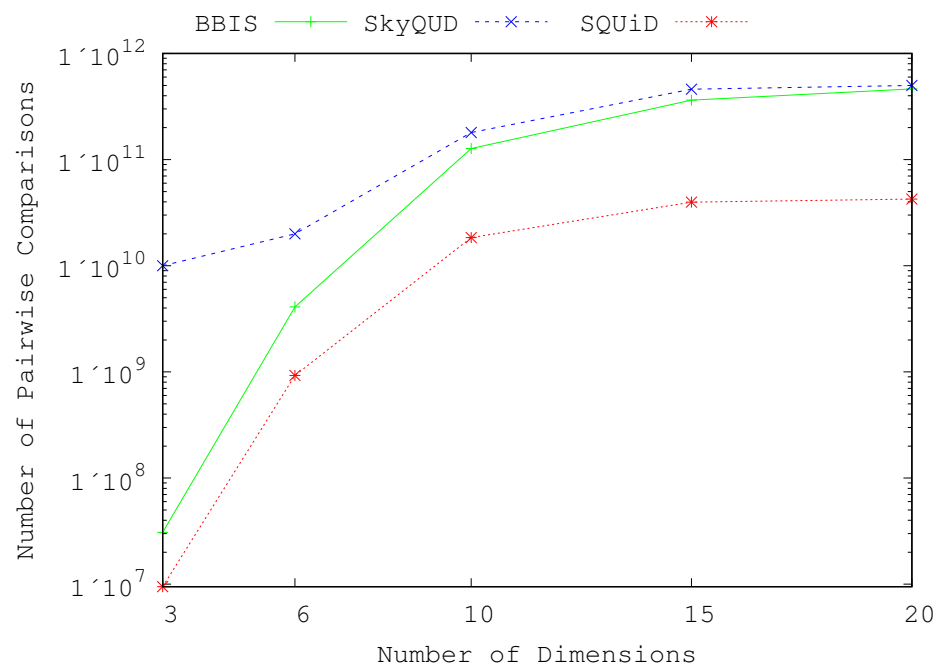

Supplement: SQUiDExperimentalResults.zip [file SQUiDExperimentalResults.zip]

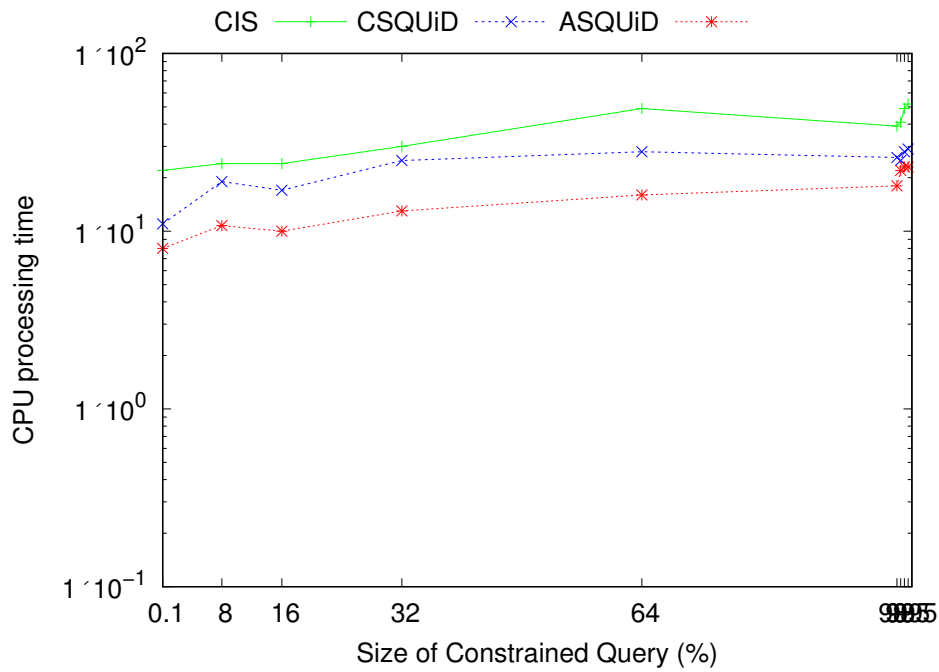

Supplement: SQUiDExperimentalResults.zip [file SQUiDExperimentalResults.zip]

Number of Pairwise Comparisons

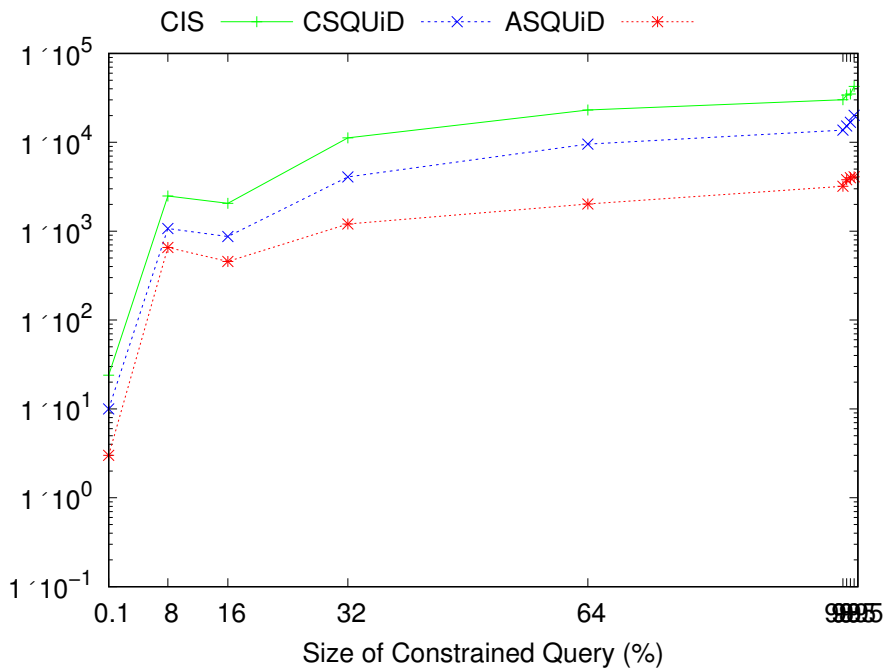

Supplement: SQUiDExperimentalResults.zip [file SQUiDExperimentalResults.zip]

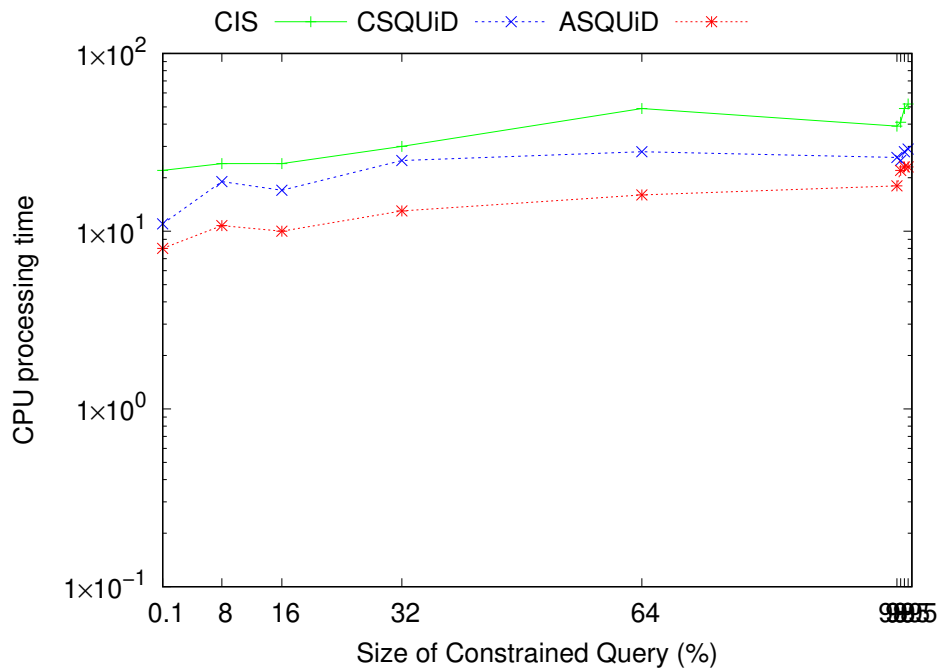

Supplement: SQUiDExperimentalResults.zip [file SQUiDExperimentalResults.zip]

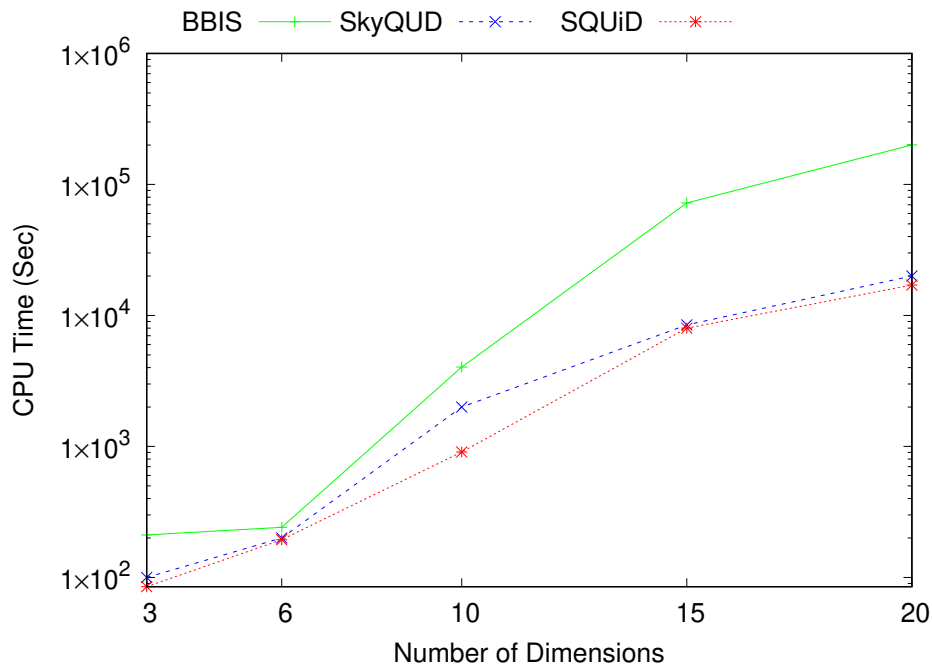

Supplement: SQUiDExperimentalResults.zip [file SQUiDExperimentalResults.zip]
